1  
2  
3  
4  
5  
6  
7  
8  
9  
10  
11  
12  
13  
14  
15  
16  
17  
18  
19  
20  
21  
22  
23  
24  
25  
26  
27  
28  
29  
30  
31  
32  
33

**Social experience dependent plasticity of mouse *song* selectivity without that of *song* components**

Authors: Swapna Agarwalla<sup>1</sup> and \*Sharba Bandyopadhyay<sup>1,2</sup>

<sup>1</sup>Information Processing Laboratory, Department of Electronics and Electrical Communication Engineering, IIT Kharagpur, <sup>2</sup>Advanced Technology Development Centre, IIT Kharagpur

\*Corresponding author email: [sharba@ece.iitkgp.ac.in](mailto:sharba@ece.iitkgp.ac.in)

40 Pages, 7 Figures, 5 Supplementary Figures

Author contributions: SB and SA conceived the project, SA performed all experiments, SA and SB analyzed data. SB supervised the work. SB, SA wrote the manuscript.

Acknowledgements: SA thanks MHRD for Institute Fellowship, SB thanks India Alliance, IIT Kharagpur, MHRD and SRIC Cell, IIT KGP for start-up and Challenge Grant funds. *This work was supported by the DBT/Wellcome Trust India Alliance Fellowship/Grant IA/I/11/2500270 awarded to SB and India-Czech Bilateral Scientific and Technological Cooperation DST India.*

## 34 Abstract

35 Syllable sequences in male mouse ultrasonic-vocalizations (USVs), “songs”, contain structure -  
36 quantified through predictability, like birdsong and aspects of speech. Apparent USV innateness and  
37 lack of learnability, discount mouse USVs for modelling speech-like social communication and its  
38 deficits. Informative contextual natural sequences (SN) were theoretically extracted and they were  
39 preferred by female mice. Primary auditory cortex (A1) supragranular neurons show differential  
40 selectivity to the same syllables in SN and random sequences (SR). Excitatory neurons (EXNs) in  
41 females showed increases in selectivity to whole SNs over SRs based on extent of social exposure  
42 with male, but syllable selectivity remained unchanged. Thus mouse A1 single neurons adaptively  
43 represent entire order of acoustic units without altering selectivity of individual units, fundamental  
44 to speech perception. Additionally, observed plasticity was replicated with silencing of somatostatin  
45 positive neurons, which had plastic effects opposite to EXNs, thus pointing out possible pathways  
46 involved in perception of sound sequences.

47

## 48 Introduction

49 Parallels between birdsong and speech have been a matter of interest for a long time<sup>1,2</sup> because of  
50 similarities in vocal learning<sup>3,45</sup> and production<sup>6</sup>, and presence of song and order selective auditory  
51 circuits<sup>7,8</sup> in songbirds. Rudimentary components of the same have been argued to exist in the  
52 mouse<sup>9,10</sup>. However, mouse ultrasonic vocalizations (USVs), while context specific<sup>11,12,13</sup> and of  
53 communicative significance<sup>14,15</sup>, appear to be largely innate<sup>10,16,17</sup>. Thus the mouse, a mammal with  
54 powerful genetic tools and techniques available<sup>18,19</sup> fails to fully serve as the agent for a model for  
55 speech like communication and to study autism spectrum and other disorders with deficits in social  
56 communication<sup>16</sup>. Speech and social communication relies on informative sequences of sounds and  
57 *not*, significantly less informative, single isolated acoustic units<sup>20</sup>. The first step towards the above  
58 points would be to understand if mouse communication contains informative structured sequences  
59 of sounds. Simultaneously, it is equally important to know if its auditory system is capable of  
60 selectivity to structures of behaviourally relevant sequences as a whole and modify their  
61 representation based on social experience.

62 Selectivity to structural features of natural sounds<sup>21,22,23,24</sup> species specific vocalization  
63 encoding<sup>25,26,27</sup>, plasticity of representation of vocalizations<sup>28,29</sup>, fear or reward driven  
64 representational changes have all been studied in the A1 of the mouse<sup>30</sup> and multiple species<sup>31,32,33</sup>.  
65 Encoding of simultaneously occurring sounds by spectral integration, like harmonics or other  
66 frequencies<sup>30,34</sup> and selectivity to disyllables in marmosets<sup>35</sup> have been limited to single sound  
67 tokens over short duration. However, studies on coding of sound sequences as whole, in A1, are  
68 missing.

69 In this study we primarily ask two questions. First, is the mouse A1 capable of representing an entire  
70 sequence of behaviourally relevant sounds as a whole object, showing selectivity to sequences?  
71 Second, does representation of such sequences show experience dependent plasticity without  
72 altering relative representation of components of the sequences? We use a sequence of contexts for  
73 male mouse USV production to record context dependent USV syllable sequences. Theoretically we  
74 show the presence of context dependent structure in sequences and derive informative sequences,  
75 called natural sequences (SN). Naïve female mice showed higher preference to SN than designed  
76 control random order syllable sequences (SR). Component syllables of sequences were found to be  
77 coded in naïve female mouse A1 single neurons in a differential manner is SN and SR, which  
78 remained unchanged in experienced (exposed to male) female mice. However selectivity of single  
79 neurons to SN and SR, probed through electrophysiology and 2-photon imaging, showed higher  
80 preference to SN that increased with degree of exposure. Excitatory neurons (EXNs) showed

81 increased selectivity to SN over SR with exposure, while somatostatin positive inhibitory neurons  
82 (SOM INNs) showed the opposite behaviour. On the other hand parvalbumin positive INNs (PV)  
83 neither preferred SN or SR before, nor did their selectivity change with exposure. The same plastic  
84 changes in relative representation of SN and SR and not of component syllables are replicated with  
85 inactivation of SOM INNs paired with sequence presentation during and beyond pairing. We suggest  
86 that the known SOM INN based disinhibition of EXNs mediated by long duration activation of  
87 vasoactive intestinal peptide positive INNs (VIP)<sup>36</sup> during the exposure experience.

88 Thus we provide the first evidence of selectivity and experience driven plasticity of representation of  
89 behaviourally relevant structure of entire sequence of sounds as a whole and not the components,  
90 in mice, akin to that in the songbird<sup>37,78</sup>. Our results open up the possibility of establishing mouse  
91 communication as a model to study context based speech like communications with a set of  
92 components with predictive ordering, dependent on context<sup>13,38,39,40</sup>. While many studies have used  
93 mouse USVs for behavioural phenotyping for a variety of neurodevelopmental and communication  
94 disorders<sup>16,41</sup>, with basic features of single USVs and bouts, our results immensely increase the  
95 potential of mouse models to study such disorders. The current work also suggests a relook at  
96 studies on mouse vocalization production which have primarily focussed on production of syllables  
97 and syllable sequences without considering production of particular orders in syllable sequences.

98

## 99 **Results**

### 100 *Male mice produce context dependent syllable sequences preferred by female mice*

101 We developed a protocol for male mouse vocalization production, in three different contexts,  
102 referred to as Alone (M), Separated (MSF) and Together (MF) (Fig. 1A). Lone naïve adult male mice  
103 ( $n=4$ , P56-P90), with no social exposure to a female were placed in a cage in a sound chamber (M, 5-  
104 10 minutes) and they did not emit any vocalizations (Fig. 1A, *top left*). Next a naïve female mouse  
105 (P56-P90) was introduced into the cage, separated from the male by a mesh (Fig. 1A, *middle row*)  
106 and vocalizations were produced by the male (MSF, 5-10 minutes). Finally the mesh was removed  
107 and the female and male were exposed to each other and vocalizations were recorded (MF, 5-10  
108 minutes). We repeated the process with the same pair of mice for at least 5 days until the male  
109 mouse emitted vocalizations in the Alone condition (see Methods). Ultra-frequency (UF) vocalization  
110 recordings (20kHz - 120 kHz) made from the above stage onwards for the following 5-7 days, in 4  
111 pairs of mice, were further analysed and grouped into the three contexts stated above.

112 Vocalization sequences were first automatically annotated by detecting UF-syllables based on  
113 energy threshold (see Methods) and further by categorizing syllables into five types (see Methods,  
114 Fig. 1B,<sup>42</sup> based on their spectrograms with pitch jumps as the distinguishing feature<sup>43</sup>. The syllable  
115 types were, N (Noisy), S (Single frequency contour), J (Jump type, with a single jump in frequency), H  
116 (Harmonics) and O (Others – consisting of multiple Jumps). The relative percentage of the different  
117 kinds of syllables produced by male mice in each context (Fig. 1C) showed distinct differences. The  
118 overall difference in the distributions of syllables in each pair of the contexts was quantified using  
119 Kullback Leibler Divergence (KLD, see Methods)<sup>44,45,42</sup>. All pairs of distributions were significantly  
120 different at 95% CI (see Methods). However, the MF condition showed the most distinct distribution  
121 having high distances from the others, with the M and MSF cases showing a similar nature. In spite  
122 of differences in distributions, order of syllables could be random in the 3 contexts. To probe the  
123 non-random nature of syllables, we analysed syllable to syllable transition probability matrices as  
124 done in multiple studies<sup>39,43,46</sup> (see Methods) with two successive syllables (Fig. S1A) or disyllables.  
125 We found distinct differences, quantified with KLD (Fig. S1B), between the different contexts  
126 suggesting differences in structure of syllable order.

127 In order to probe higher order structure in syllable sequences, analyses as above with 3 or more  
128 successive syllables require large amounts of data for reliable estimation of transition probabilities.  
129 Thus to analyse structure in the order of syllables emitted<sup>39,42,43,47</sup> the entire period of vocalization  
130 recordings of each session was divided into bouts based on the inter-syllable interval distribution  
131 (Methods, mean=90 ms, STD=160 ms). Silence intervals more than 250 ms in duration were used to  
132 mark the end of a bout of vocalizations (Fig. S1C). The syllable following the immediately preceding  
133 end of a bout was considered as the start of the next bout and successive syllables in a bout were  
134 considered as a vocalization sequence of syllables<sup>42</sup>. Thus bouts of vocalizations could have only one  
135 or many syllables (observed up to 30 syllables, Fig. S1D, total 948(M), 3320(MSF) and 6656(MF)  
136 bouts recorded). Bouts of vocalization with 3 or more syllables are referred as *sequences* (see  
137 Methods) in the rest of the paper. With  $S_i$  denoting the  $i^{\text{th}}$  syllable of a bout, the mutual information  
138 (MI) between  $S_1$  and  $S_i$ , denoted  $I(S_1;S_i)$  were computed, debiased and tested for significance based  
139 on CI (see Methods). Significant MI between syllables at different positions in a bout shows  
140 dependence between the syllables or predictability, the basis of structure in sequences<sup>20,42</sup>. We  
141 found that in the 3 contexts significant dependence existed between the first and other syllables in  
142 bouts of vocalizations (Fig. 1D). The dependence was strongest and longest in the MF context and  
143 weakest and shortest in the M condition. Thus the 3 contexts had different degrees of dependence  
144 in syllables of sequences. Similar results were observed for  $I(S_j;S_{j+k})$  for  $j = 2,3 \dots$  and  $k = 1,2 \dots$  (Fig.  
145 S1E) showing dependence exists within the sequence beyond that on the first syllable. Thus context  
146 dependent sequences are produced by male mice with degrees of structure varying with context.

147 To further understand what order of syllables, if any, were involved in providing such dependence in  
148 the sequences, we found the high probability sequences produced in the 3 contexts (Fig. 1E,  
149 sequence 13 to 20, see Methods). The 8 sequences obtained are called natural sequences,  
150 henceforth and denoted by SN. The natural sequences or their sub-sequences (from the starting  
151 syllable with at least 3 syllables) constituted 36% (MF) and 24% (MSF) of all the recorded sequences  
152 of length 3 or more in the two contexts. The percentages of such sequences occurring by chance  
153 based on the MF and MSF syllable probability distributions (Fig. 1C) were only 11% and 8%. The SN  
154 were also 8 of the 10 sequences with the highest accumulated surprise<sup>48</sup> (see Methods) showing that  
155 they were among the most informative<sup>44</sup> among the repertoire of syllable sequences produced in  
156 the 3 contexts. As expected from the results of MI (Fig. 1D), the longest SN were in the MF condition  
157 and MF and MSF conditions had distinct sets of SN indicating context dependent specific sequence  
158 production in social encounters of male and female mice. The only high probability sequence in the  
159 M context was also present in the MSF context and is possibly a search sequence prior to finding a  
160 female mouse. However, all the SN sequences were present in the MF condition and thus during MF  
161 the female was exposed to all the SN. To study the importance of the SN, both from a behavioural  
162 perspective and coding perspective, as control, 12 other sequences were designed. Four randomly  
163 ordered sequences were created from the probability distributions of syllables in each context (Fig.  
164 1C). The above sequences each with 7 syllables, the length of the longest SN, are considered as  
165 random sequences (Fig. 1E, sequence 1 to 12, see Methods) and denoted by SR.

166 Although SN were obtained from male vocalizations produced during social exposure to females, the  
167 sequences need not be behaviourally relevant to naïve females. We tested the relevance of the  
168 specific sequences obtained with a 2-sided free access/choice test<sup>12,39</sup> (see Methods). Two sets of  
169 experiments were done, one in which 8 of the 12 SR were truncated to match the number of  
170 syllables in SN (Fig. 1E, shaded SRs, same length) and the other in which all SR had 7 syllables as in  
171 the longest SN. The latter case was used to provide the maximum possibilities of syllable to syllable  
172 transitions that could be naturally occurring. The above allowed us to probe the relevance of the full  
173 sequence as opposed to natural transitions or disyllables occurring randomly. Naïve female mice  
174 (P56-P90,  $n = 9$  (2 outliers), same length,  $n = 7$  (1 outlier), 7 length) were placed in an open cage, for 4  
175 distinct sessions (S1-S4) with sounds presented in S2 and S4 (see Methods). Sequences from SR were  
176 played back from one corner and those from SN from the opposite corner, alternately every 5

177 seconds, in S2. SR and SN's respective sides were switched in S4 to remove any side bias (Fig. 1F, *top*  
 178 row). Female mice had significantly higher preference ( $p < 0.001$ , both cases) for SN independent of  
 179 which side SN was played back, both for equal length and length 7 sequences (Fig. 1E, *bottom* row,  
 180 quantified by dividing the cage floor into 3 equal parts denoting SN, Neutral and SR, see Methods).  
 181 Thus the extracted natural sequences are relevant to naïve female mice and are preferred over the  
 182 designed SR.

183

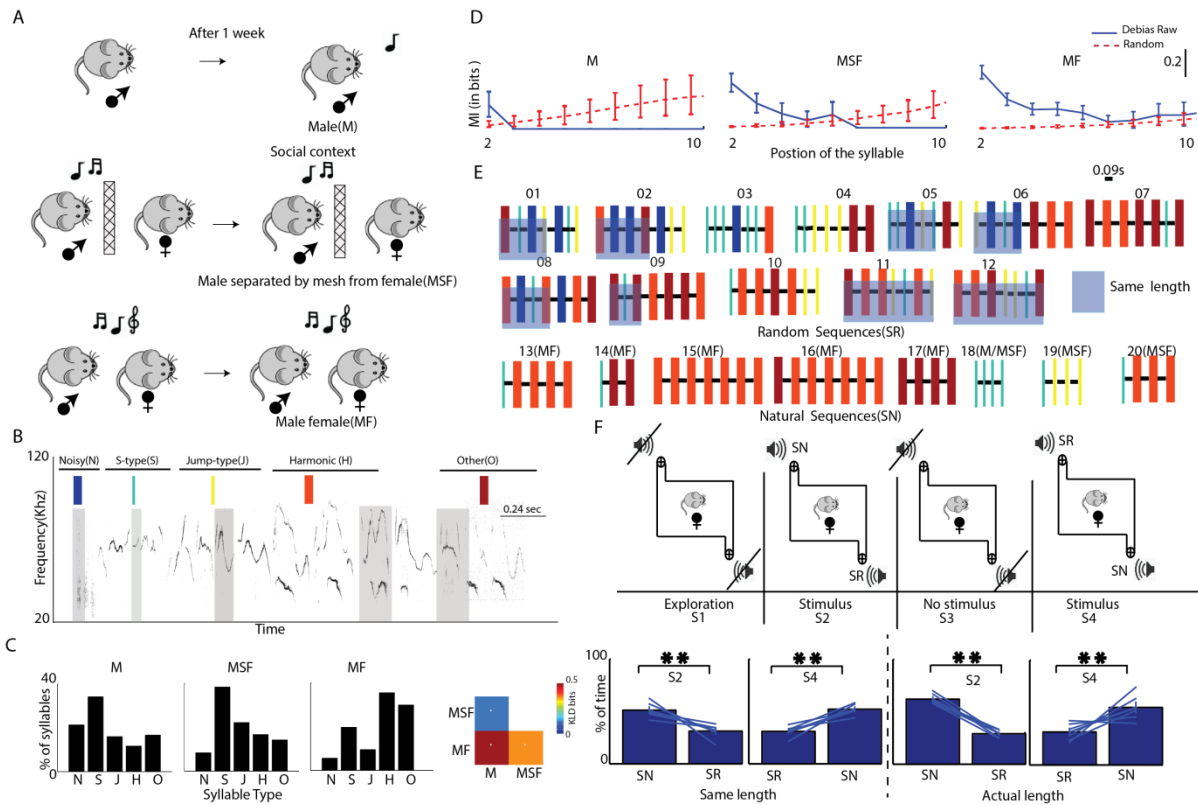

184

185 **Figure 1. Naïve female mice prefer natural sequences emitted by male mice during social exposure**

186 A) Schematic depicting the three social contexts (M, MSF and MF) in which male mouse vocalizations were recorded. B)   
 187 Examples of spectrograms of representative syllable types, with one in each type highlighted with shaded background.   
 188 Different syllable types are depicted with different color bars with widths denoting respective durations. C) Probability   
 189 distributions, *pmfs*, of the different syllable types in the 3 contexts shown as bars with percentage of syllables. D) Plots of   
 190 MI,  $I(S_i; S_j)$  with  $i=1,2 \dots 10$  in the 3 different contexts in blue with 95% CIs. Red plots, with 95% CIs, show the expected   
 191 extent of '0' MI estimate from the data after scrambling order of syllables. Lack of overlap of the CIs (red and blue) indicate   
 192 significant MI. E) The set of sequences created for SR and extracted for SN are depicted with the colored bars, as in B. The   
 193 light blue background in a subset of the SR indicates the sequences for same length case. The SNs in 3 different contexts   
 194 are identified above each SN. F) *Top row*: S1-S4 depicts the 4 sessions recorded with S1 and S3 having no sounds played. A   
 195 fifth session S5, not depicted, was also recorded in which no stimulus was played. S2 and S4 have sounds played from   
 196 speakers as indicated. *Bottom row*: The two bar plots to the left of the dashed line show bars indicating time spent on side   
 197 of SN and SR in S2 and S4, in equal length case. The same for the SR having 7 syllables is shown to the right of the   
 198 line.

199 **Single units in A1 code single syllables and disyllables differentially in SN and SR**

200 To investigate coding of behaviourally relevant natural sequences of vocalizations, SN, relative to SR,   
 201 we first performed extracellular single unit recordings from Layer 2/3 (200-350 um from the surface)   
 202 of mouse A1 using multi-electrode arrays<sup>49,50</sup> (Fig. S2AB). Three groups of mice were used, passively   
 203 listening awake naïve females (AwF group, 328 units from 6 animals, chronic recordings, over 10-14   
 204 days), anaesthetized naïve females (AF group, 266 units from 12 animals) and naïve males (AM



205 group, 195 units from 8 animals). Typically 5 (between 4 and 6) repetitions of each stimulus of SR (1-  
 206 12) and SN (13-20) were presented in pseudorandom order (Fig. 2A, left) and single unit spiking (Fig.  
 207 2A inset, red) with 500 ms baseline was recorded. The stimuli varied in length based on the  
 208 component syllables, from 0.389s to 1.233s. PSTHs were constructed and responses locked to single  
 209 tokens were observed throughout the sequences of SR and SN (Fig. 2A, right).

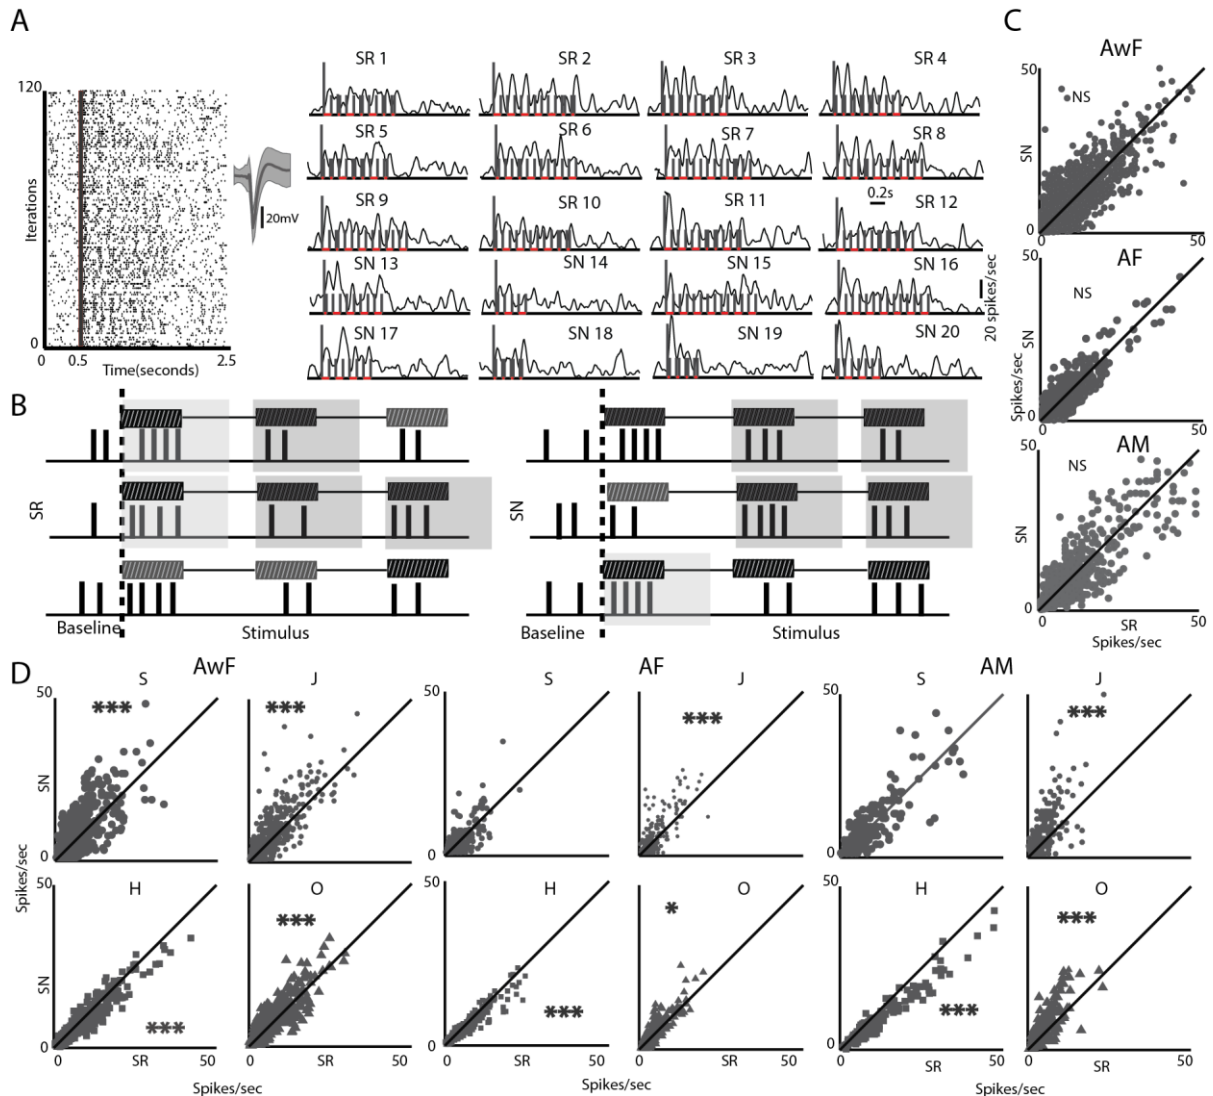

210

211 **Figure 2. Coding of single syllables in mouse A1 depends on context**

212 A) Representative dot raster plot of single unit spiking responses to SN and SR presented in pseudo random order (spike  
 213 shape to the right). Smoothed PSTHs of the same unit for each stimulus sequence is shown with stimulus start (tall line)  
 214 followed by lines marking start and end of each subsequent syllable. B) Schematic for calculation of responses to common  
 215 syllables in the first position and within the sequences in SN and SR. C) Scatter plots show comparison of mean response  
 216 rates of all common first syllables in SN and SR in 3 groups of mice, AwF, AF and AM. D) Scatter plots comparing mean  
 217 response rates of common syllables (identified by solid symbols, S: large circle, J: small circle, H: square, O: triangle) in SN  
 218 and SR, excluding occurrence in the first position for the same groups in C.

219 Syllables S, J, H and O and disyllables or transitions S-S, J-J, H-H and O-O were present in both SR and  
 220 SN, excluding the first syllable any sequence. The first syllable ( $S_1$ ) was excluded as its occurrence  
 221 does not contain any sequence information (Fig. 2B). Thus, as a control, in all 3 groups of animals  
 222 average rate responses of each syllable type when occurring as  $S_1$  were compared (grey shade, Fig.  
 223 2B, see Methods). As expected, none of the syllable's responses in the first position showed any  
 224 difference between SN and SR (Fig. 2C, Fig. S2A for each syllable). Next, we compared the single unit

225 rate responses of syllables and disyllables, present in both SR and SN, between the random and  
 226 natural conditions (Fig. 2B, see Methods). Syllables J and O, across all three groups of animals,  
 227 elicited higher average rates in A1 single units when occurring in SN than when they occurred in SR  
 228 (*paired t-test*,  $p < 0.01$  in all cases, except syllable O in AF had  $p < 0.05$ , Fig. 2D). However, syllable H  
 229 across all the animal groups evoked lower average rates in SN than in SR (*paired t-test*,  $p < 0.01$  in all  
 230 cases). Syllable S produced significantly higher rates when in SN (*paired t-test*  $p < 0.01$ ) compared to  
 231 when in SR for AwF group and response strength of S was not significantly different in SN and SR in  
 232 the other 2 groups of animals. Thus the single syllables were encoded differentially in a natural  
 233 context than in a random context – specifically a higher response was generally elicited in SN than in  
 234 SR, except for the H syllable. The differences could be an effect of stimulus specific adaptation SSA,  
 235 <sup>51,50,52</sup> due to repeated presentations of syllables more so in SN (for example H in SN15 and SN16).  
 236 Absence of such long repeats of H in SR could potentially explain the lower response rates to H in SN

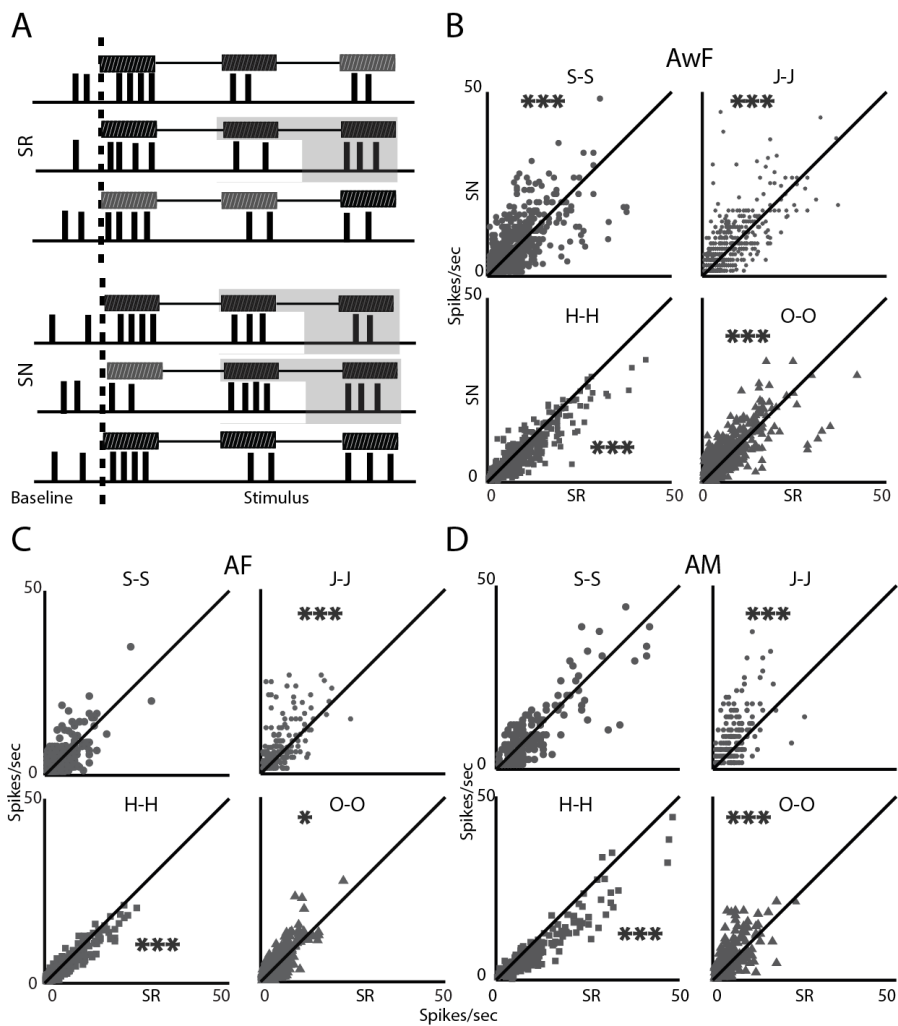

237

238 **Figure 3. Coding of single disyllables in mouse A1 depends on context**

239 A) Schematic for calculation of mean rate responses to transitions/disyllables based on response to the second  
 240 component, excluding the first transition. B-D) Scatter plots comparing mean response rate of common  
 241 disyllables in SN and when in SR for the three groups AwF (B), AF (C) and AM (D).

242 compared to SR (Fig. 2D). Repetitions of up to 4 successive syllables are present for S, J and O in SN  
 243 with such repeated occurrence of them absent in SR, but these syllables evoked higher rates in SN  
 244 than SR. Thus it is unlikely that adaptation can explain the observed context dependent responses to  
 245 tokens. To finally rule out adaptation to be the cause of such differences, we compared the average

246 adaptation profiles (Fig. S2B) in SN and SR, by normalizing each single unit's mean response to the  
247 first token to be 1, which was not significantly different between SN and SR for any token (Fig. 2C,  
248 Fig. S2A). No significant differences were found in the adaptation profile based on average token  
249 wise responses over SN and SR across animal groups.

250 The above results suggest that relative ordering of the syllables is likely an important determinant of  
251 the difference in responses of individual syllables in SN and SR. We thus considered coding of the  
252 common disyllables in SN and SR, considering only the response to the second syllable in the  
253 transition (Fig. 3A, see Methods). Comparison of rate responses to transitions in SN and SR showed  
254 similar results as single syllables, with S-S, J-J and O-O transitions generally showing stronger  
255 responses when present in SN than when present in SR across all animal groups (except S-S in AF and  
256 AM, Fig. 3B-D). As with responses to the single syllable H, the transition H-H had higher responses in  
257 the random context compared to the natural context across all groups of animals (Fig. 3B-D). Syllable  
258 transitions of other kinds (Fig. S1A) were not common to both SN and SR. All the other kinds of  
259 disyllables in SN were present as the first transition, which were excluded, as the first syllable did not  
260 have context information (Fig. 2C and S2A). However, the other disyllables occurring as the first  
261 transition in SN (S-J, S-H, S-O and O-H) were significant in transition matrices (Fig. S1A). Thus we  
262 compared responses of the above transitions based on the response to the second token of the  
263 transition, between SN and SR (Fig. S3). In the above remaining cases also we generally find higher  
264 responses to the transitions when occurring in SN compared to that when occurring in SR.

265 *Social exposure to male alters coding of entire natural sequences but not their component syllables in*  
266 *female A1*

267 Our results show that naïve males and females both show the same results of differential coding of  
268 single syllables in the two sets of stimuli, SR and SN (Fig. 3). Further, the SN stimuli used are  
269 preferred by naïve female mice compared to SR (Fig. 1F). Social exposure between adult male and  
270 female mice (>P56) is a significant event constituting the SN USVs produced<sup>15,39,53</sup> (Fig. 1). Further H  
271 syllables and sequence of H's were a major component of the USVs especially in MF (Fig. 1C, 1E).  
272 Thus we hypothesize that the context specific coding of syllables and disyllables would change,  
273 especially for syllable H and disyllable H-H, both of which showed lower responses in SN.

274 We first tested the above with single unit recordings from Layer 2/3 of A1 of experienced female  
275 mice (Fig. 4A, see Methods) with different number of days of exposure to male mice (1-5 days of  
276 exposure, 421 units from 8 animals, AF-AFEx). Since the differential coding observed for syllables and  
277 disyllables were same in AwF and AF (Fig. 2C and Fig. 3BC) except for S, we considered rate  
278 responses in anaesthetized mice. First, as a control for context independence, we confirm that  
279 responses to all first syllables did not change between SN and SR (Fig. 4B, and Fig. S4A for each  
280 syllable type). Contrary to our hypothesis we found that experienced females had identical  
281 differential representation of single syllables (Fig. 4C) and disyllables (Fig. 4D) as the naïve females  
282 (Fig. 2C and 3B-D, before exposure, AwF-BFEx and AF-BFEx, except S and S-S in the latter case).  
283 However, selectively stronger responses to S in SN in AwF-BFEx and AF-AFEx compared to that in SR,  
284 suggests that the exposure likely had little effect on context specific coding of single syllables and  
285 transitions. As in the other groups, adaptation could not explain the context dependent coding of  
286 single syllables in the experienced females (Fig. S4B).

287 Thus we hypothesize that the entire sequences in SN are treated as objects that are behaviorally  
288 relevant in the male female exposure. Further, sequences in SNs appeared as the most informative  
289 set of sequences in the exposure event, over multiple days. Thus we compared rate based sequence  
290 selectivity of individual neurons (see Methods) and compare mean selectivity to SR and SN in the  
291 population of neurons in each group (Fig. 4E). Both AwF-BFEx and AF-BFEx showed higher selectivity  
292 to SN than SR (*paired-ttest*,  $p < 0.001$ ) with no difference between the two groups of females  
293 (*ANOVA*,  $p > 0.05$ , SN,  $p > 0.05$ , SR), reiterating lack of difference in such selectivity in the awake and



294 anaesthetized conditions. AM-BFEx also showed increased selectivity to SN compared to SR, and  
 295 surprisingly, had higher selectivity for SN than naïve females (ANOVA,  $p < 0.001$ , AwF-BFEx,  $p < 0.001$ ,  
 296 AF-AFEx). The AF-AFEx group of mice showed the highest difference between SR selectivity to SN and to

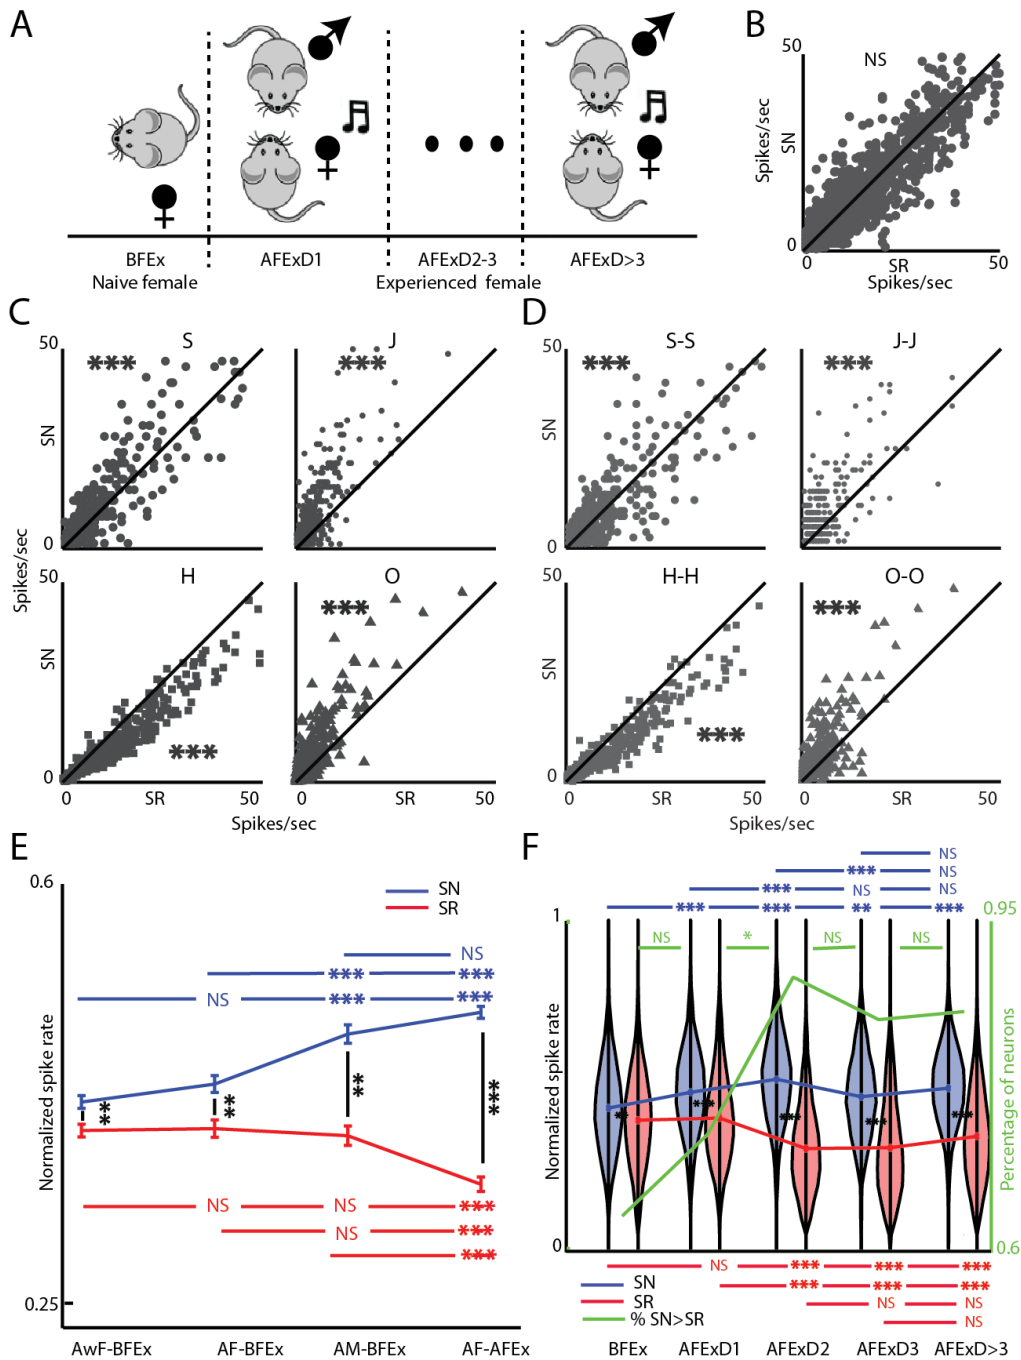

297

298 **Figure 4. Plasticity in single units' selectivity to entire SN sequences and not its components**

299 A) Schematic of social exposure protocol of female mice with male mice over days. B) Scatter plot for comparison of mean  
 300 response rates to the common first syllables in SN and SR, following exposure. C-D) Scatter plot to compare mean rate  
 301 responses to common syllables (C) and disyllables (D) as in Fig. 2D and Fig. 3 respectively. E) Comparison of mean overall  
 302 selectivity to sequences in SN to that in SR and comparisons across groups before exposure (AwF-BFEx, AF-BFEx and AM-  
 303 BFEx) and after exposure (AF-AFEx). F) The mean selectivity to SN and SR in AF-BFEx in E) are compared with selectivity to  
 304 SN and SR over days of exposure and within days of exposure. Violin plots for each day show the variability of the data sets.  
 305 Thick green line shows percentage of units with higher selectivity to SN than to SR (axis to the right).

306 SR. Interestingly, females after exposure had lower selectivity to SR compared to all other groups  
307 (ANOVA  $p < 0.001$ , AwF-BFEx,  $p < 0.001$ , AF-BFEx,  $p < 0.001$ , AM-BFEx). Also, the selectivity to SN of AF-  
308 AFEx was similar to that of AM-BFEx (ANOVA,  $p > 0.05$ ) but significantly higher than naïve females  
309 (ANOVA,  $p < 0.001$ , AF-BFEx,  $p < 0.001$ , AwF-BFEx).

310 To further test that the increased difference in selectivity in experienced female mice was due to the  
311 exposure to male mice we considered the effect of multiple days of exposure (D1, D2, D3 and D>3,  
312 Fig. 4A). First we observe that on every time point considered, selectivity to SN was significantly  
313 higher than selectivity to SR during the exposure period (Fig. 4F, *paired t-test*,  $p < 0.0001$ , D1,  
314  $p < 0.0001$ , D2,  $p < 0.0001$ , D>3,  $p < 0.0001$ ) The effect of exposure over days shows that the selectivity to  
315 SN in AF-AFEx was significantly higher than that in AF-BFEx on all the days (ANOVA,  $p < 0.0001$ , D1,  
316  $p < 0.0001$ , D2,  $p < 0.001$ , D3,  $p < 0.0001$ , D>3). Moreover we found that selectivity to SN increased  
317 significantly over the first two days (ANOVA, D1>BFEx,  $p < 0.0001$ , D2>D1,  $p < 0.0001$ ) following D2,  
318 there was no significant change in selectivity to SN and was saturated. On the other hand selectivity  
319 to SR was unchanged on D1 (ANOVA  $p > 0.05$ ) and decreased on D2 (ANOVA,  $p < 0.0001$ ) and then  
320 remained unchanged over further days (ANOVA,  $p > 0.05$ , D2/D3,  $p > 0.05$ , D3/D>3) while being  
321 significantly less than that of naïve females and that of AF-AFExD1 (ANOVA,  $p > 0.05$ ). These  
322 observations are clearly consistent with the idea that exposure or experience dependent plasticity  
323 occurs to increase selectivity to the entire sequence but not its component syllables and disyllables.  
324 Since responses of SR and SN are from the same neurons collected in pseudo random order,  
325 suggests that neurons with higher selectivity to SN also lose selectivity to SR over days to maximize  
326 differences of the relevant sequences from any others. Thus although the AFExD2 group of mice  
327 were never exposed to the SR we find a decrease in selectivity to SR. The difference in selectivity to  
328 SN and SR saturates after D2 and it is explained by the fraction of units in L2/3 of A1 that have higher  
329 selectivity to SN than to SR (Fig. 4F, green thick line, *chi-square test*,  $p > 0.01$ ). Fraction of units with  
330 higher selectivity for SN than SR significantly increases on D2 from D1 (*chi-square test*,  $p < 0.05$ )  
331 coincident with the decrease in mean selectivity of SR.

332 *Somatostatin (SOM) positive interneurons and Thy-1 excitatory neurons behave differentially during*  
333 *observed experience dependent plasticity in natural sequence selectivity*

334 To elucidate the mechanisms underlying the observed plasticity, we hypothesized the involvement  
335 of inhibitory interneurons as observed in multiple studies<sup>54</sup>. Our single unit recordings are mostly  
336 regular spiking and hence extracting putative fast spiking inhibitory neurons is not possible. Our final  
337 conclusions above are based on responses to entire sequences (0.389s – 1.232s) and not fine time  
338 scale activity information. Thus Ca<sup>2+</sup> dependent fluorescence imaging was performed in naïve and  
339 experienced female mice in the awake state through a cranial window (see Methods). We used 3  
340 types of mice to image activity of Thy-1 positive excitatory neurons (EXNs, JAX- 24339, n= 3 mice)  
341 and genetically identified individual inhibitory neurons types (INNs, SOM JAX-13044 crossed with JAX  
342 24105, n= 3 mice and parvalbumin positive, PV, JAX-8069 crossed with JAX-24105, n= 2 mice).

343 We first performed widefield Ca<sup>2+</sup> imaging<sup>55,56</sup> (see Methods) to identify location of A1 with UF<sup>57,58</sup>  
344 and other auditory areas<sup>59</sup> (Fig. 5A). Following identification of A1 (see Methods), fine scale 2-  
345 photon imaging (see Methods) with single neuron resolution was performed by restricting individual  
346 ROIs (120-150  $\mu\text{m}$  x 300-350  $\mu\text{m}$ ) within A1. Single ROIs (Fig. 5B, 2-3 per day) were imaged in each  
347 group of mice, female before exposure (AwFlm-BFEx, Thy-GCamp, Fig. 5B *left*, SOM-GCamp, Fig. 5B  
348 *middle*, PV-GCamp, Fig. 5B *right*) and after exposure (AwFlm-AFEx. Chronic recordings in this case  
349 allowed collecting data from same animals over different days of exposure (5 days), however, same  
350 neurons could not always be tracked reliably over days. As expected from the literature we obtained  
351 data from 100+/-20 neurons in each ROI of Thy-GCamp mice and 6+/-4 and 8+/-4 neurons in each  
352 ROI from SOM-GCamp and PV-GCamp mice respectively. Within an ROI, many neurons produced

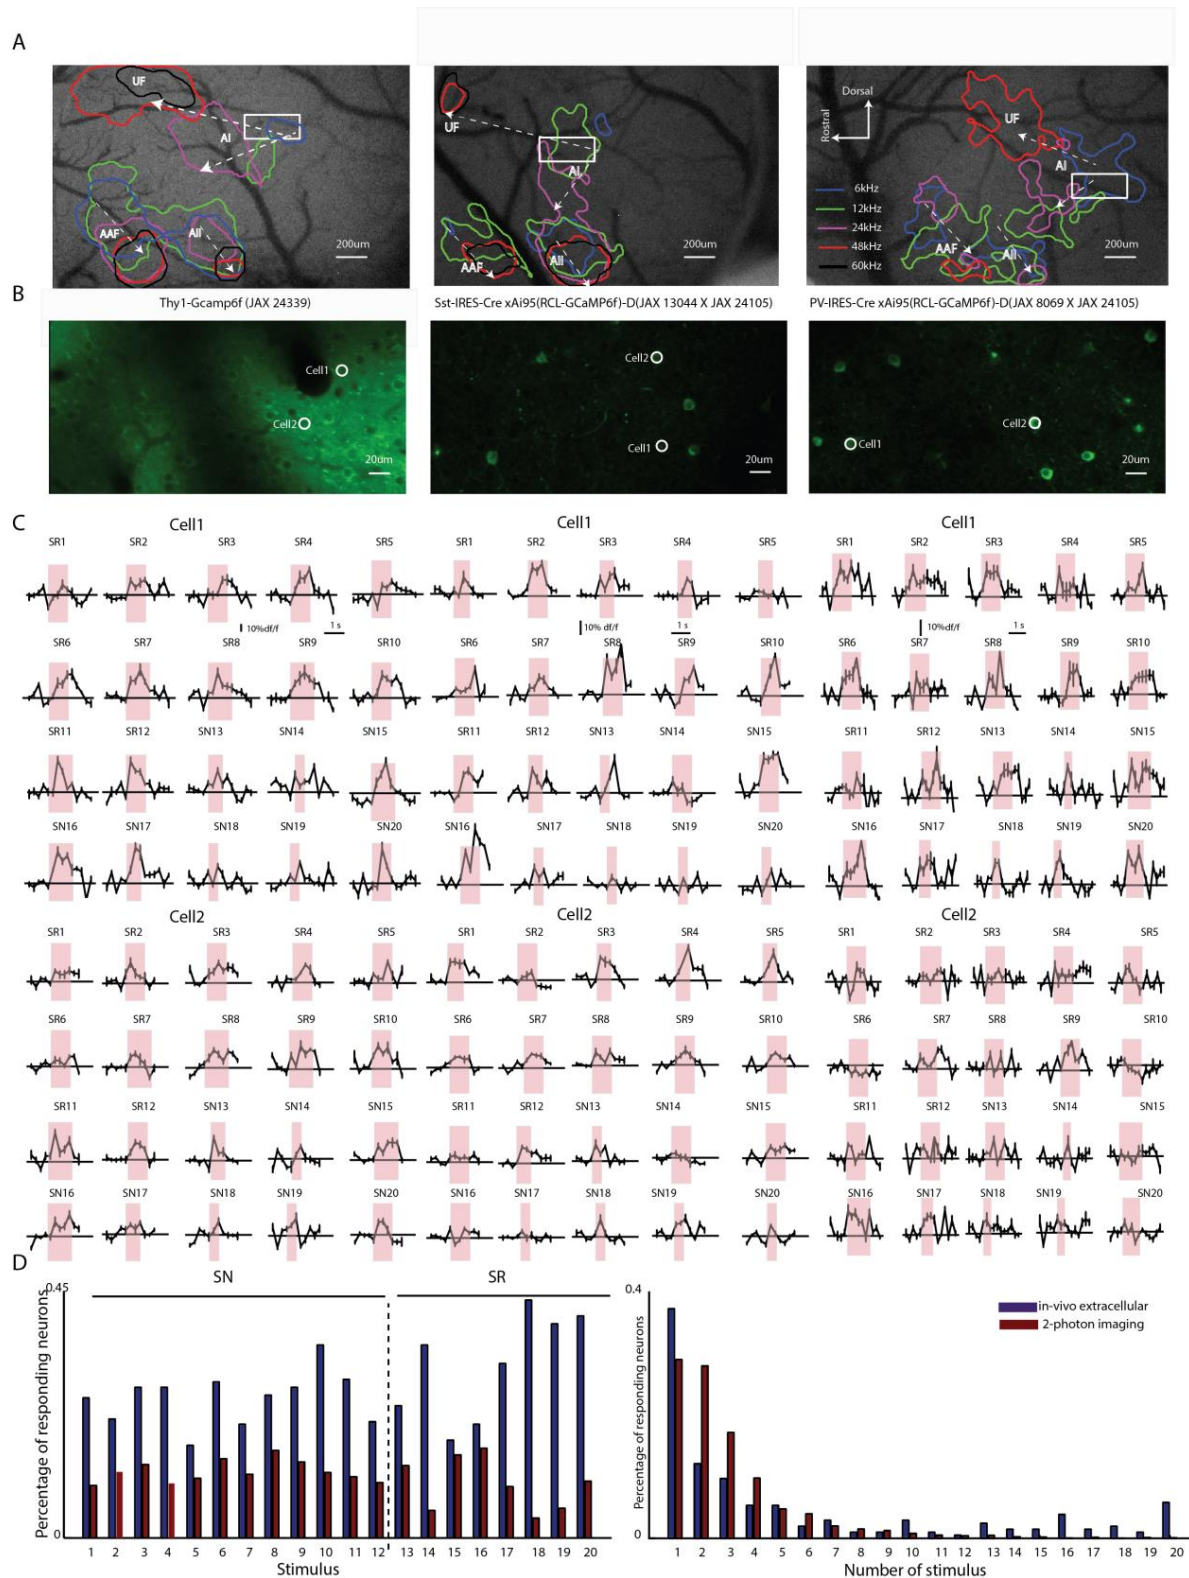

353

354 **Figure 5. Sparse responses to sequences obtained with two-photon  $Ca^{2+}$  imaging of Thy1, SOM and PV neurons**

355 A) Representative examples of tonotopy in A1 and other auditory areas in mouse A1 obtained in all 3 groups of mice (Thy-  
 356 1-GCamp, SOM-GCamp and PV-GCamp in 3 respective columns) are shown. White box marks the area shown in B) below.  
 357 B) Sample 2-photon image of an ROI in A1 in each of the 3 groups of mice. C) Average  $df/f$  plots obtained with 2-photon  
 358 imaging, in response to each of the 20 stimuli for 2 cells in each ROI (of B marked as Cell 1 and Cell 2 in each column). D)  
 359 *Left*: Bar graphs show percentage of single units (blue) with significant rate responses to each stimulus (1-20) in AwF-BFEx  
 360 and that of single Thy-1 positive EXNs (brown) with significant responses in  $Ca^{2+}$  in AwF-BFEx. *Right*: Bar graphs show (same  
 361 color representation as in *left*) percentage of neurons responding to either 1, 2, ... or all 20 of the stimuli.

362 significant responses (mean  $df/f$  compared to mean baseline  $df/f$ ,  $t$ test,  $p < 0.05$ , see Methods) to one  
363 or more stimuli in all the cases (Fig. 5C).

364 Distinct differences in response behaviour to sequences existed in population of neurons between  
365 single units (primarily, EXNs) and Thy-1 neurons'  $Ca^{2+}$  responses. In general responses are sparser  
366 with 2-P imaging and underlie some of the discrepancies observed between imaging and  
367 extracellular recordings<sup>58,60,61</sup>. Fraction of neurons responding to each of the 20 sequences (SN and  
368 SR) in the awake state show lower fractions with imaging compared to that with single unit  
369 recordings in the awake state (Fig. 5D). Similarly fraction of neurons (above two groups) responding  
370 to the number of the 20 stimuli showed that the single unit population responded less selectively  
371 than the population of neurons observed with imaging (means 2.9 and 5.6 stimuli respectively with  
372  $Ca^{2+}$  imaging and single units, Fig. 5D,  $chi$ -square test,  $p < 0.001$ ). Thus direct comparisons with single  
373 unit data may not be possible when using  $Ca^{2+}$  based responses.

374 We considered the selectivity of the three different types of neurons to SN and SR and effect of  
375 exposure in two ways. First we considered the relative selectivity to SN and SR, by grouping the  
376 neuronal populations as to how many of the SR and SN neurons of each type respond  
377 simultaneously. We first observe that before exposure, A1 single Thy-1 EXNs and SOM INNs, respond  
378 to subsets of both SN and SR similarly, with neurons responding to few or no SR also responding to  
379 few or none of SN. Neurons responding to more SR are more likely to respond to more of the SN  
380 (Fig. 6A). However, with exposure, EXNs reduce the number of SN to which they respond (see  
381 histograms below, Fig. 6A). The same is true of SOM INNs but to a lesser degree. PV INNs on the  
382 other hand (Fig. 6A, right) show similar degree of responding simultaneously to SN and SR before  
383 and after exposure. Thus, it is likely that PV neurons are less involved in the observed exposure  
384 based change in selectivity to SN.

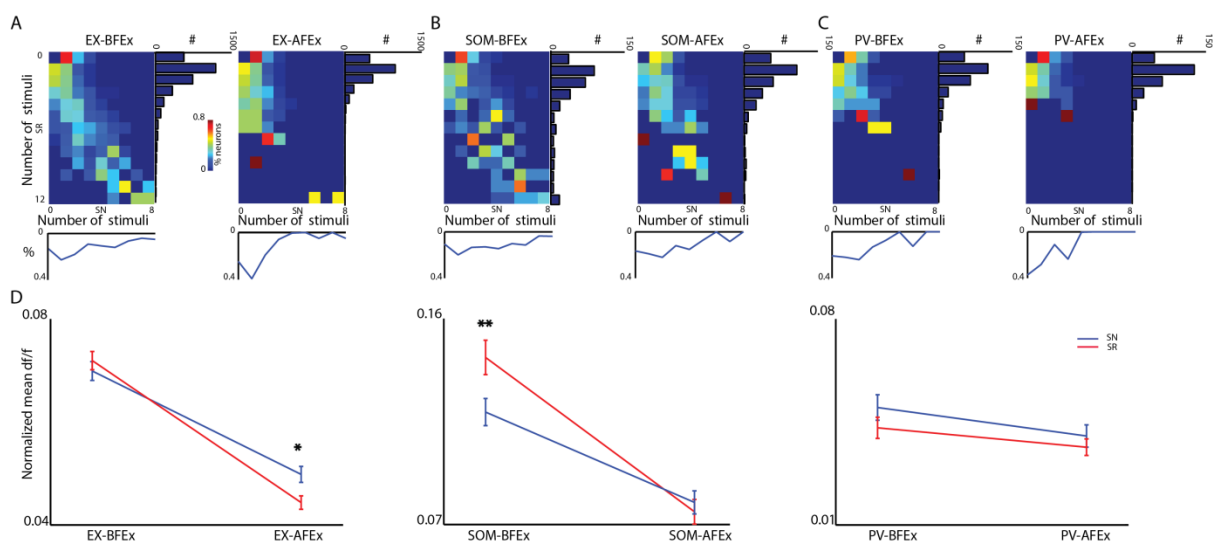

385

386 **Figure 6.** Differential effects of social experience driven plasticity in EXNs and SOM INNs

387 A-C) Each panel represents population data with 2-photon imaging in Thy1-GCamp (A), SOM-GCamp (B) and PV-GCamp (C)  
388 mice, with two matrix plots for before (left) and after (right) exposure. The rows in each matrix represent the percentage  
389 of neurons in the group and condition that respond to none (0), one, two ... to all (8) of the SN (x-axis), of the neurons that  
390 respond to none (0), one, two ... to all (12) of the SR (y-axis). Marginal distributions to the right show the number of  
391 neurons responding to the different number of SR. Distribution at the bottom of each matrix plot shows the average of the  
392 rows. D). Comparison of average selectivity to SN and SR in each condition BFEx and AFEx (before and after exposure) and  
393 between the conditions, for each neuronal type (Thy-1+, left, SOM+, middle and PV+, right).

394 Next we compared mean selectivity to SN and SR, based on responses quantified with  $df/f$  (see  
395 Methods) before and after exposure in Thy-1-GCamp female mice. We found that EXNs had  
396 increased selectivity to SN compared to SR (ANOVA,  $p < 0.001$ ) following exposure. Thus the observed



397 experience dependent plasticity of entire SN sequences observed with single units was also  
 398 observed with  $Ca^{2+}$  responses, relative to responses to SR (Fig. 6B *left*). However there was an overall  
 399 decrease in response selectivity to both SR and SN, not observed in single units. The above  
 400 departure from single unit population behaviour seen with  $Ca^{2+}$  imaging is due to the inherent  
 401 differences in the two as stated previously (Fig. 5D). Thus with the  $Ca^{2+}$  imaging data we consider  
 402 changes with respect to SR in each condition. Unlike EXNs, SOM INNs had significantly less selectivity  
 403 to SR before exposure, which is abolished following exposure (Fig. 6B *middle*, ANOVA  $p < 0.001$ ). As  
 404 with Thy-1 EXNs, exposure caused SOM INNs to also have decreased selectivity to both SN and SR.  
 405 On the contrary, PV INNs neither showed a difference in selectivity to SN compared to SR both  
 406 before and after exposure (*paired t-test*,  $p > 0.05$ ) nor did their overall selectivity vary with exposure  
 407 (Fig. 6B *right*, ANOVA,  $p > 0.05$  SN,  $p > 0.05$  SR). Thus among the two inhibitory neurons tested, we  
 408 hypothesize SOM INNs to be involved in the observed experience dependent plasticity. Also, overall  
 409 SOM INNs had the highest selectivity both before and after exposure and thus are likely capable of  
 410 mediating changes to specific stimuli.

411 *Optogenetic silencing of SOM INNs with sequence presentation induces plasticity in selectivity to*  
 412 *sequences but not sequence components*

413 To test the hypothesis of involvement of SOM in the above experience dependent plasticity of entire  
 414 sequences we performed experiments in naive anaesthetized female mice. Since AwFBFEx and AF-  
 415 BFEx mice did not show any difference in sequence selectivity between them both for SN and SR use  
 416 of anaesthetized mice is justified. Mice, (P56- P90) expressing ArchT-EGFP specifically in SOM

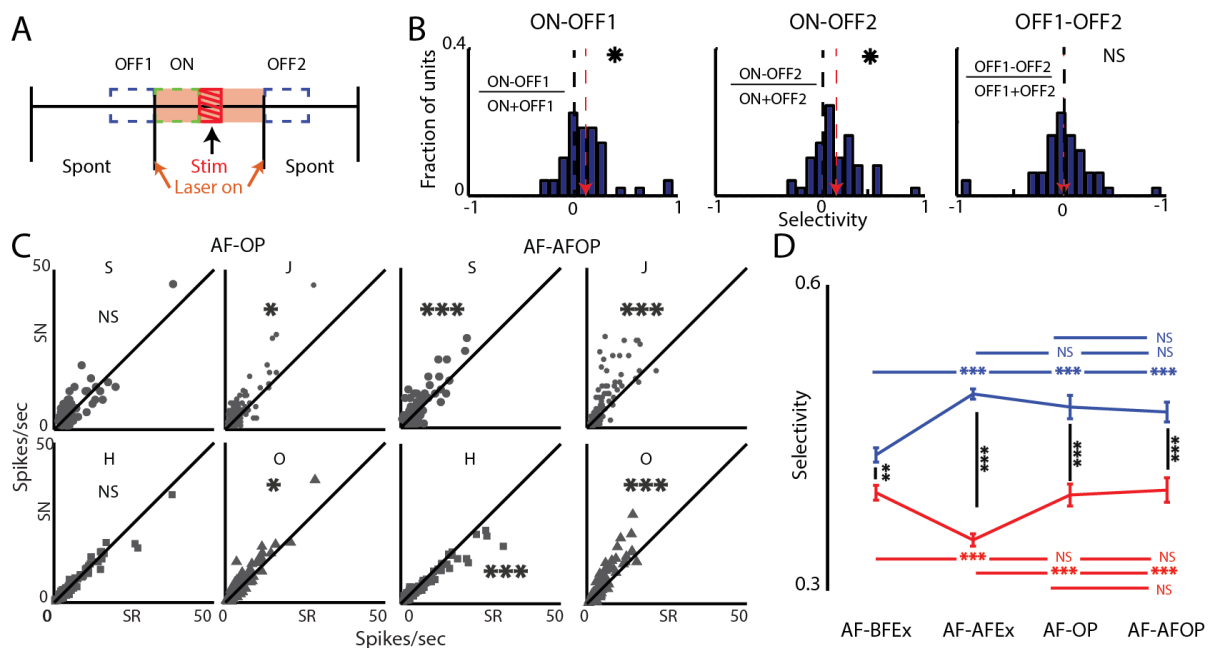

417

418 **Figure 7. Reversible silencing of SOM paired with sequence presentation mimics plasticity in sequence selectivity without**  
 419 **altering syllable selectivity**

420 A) Schematic of sequence of events for optogenetic silencing of SOM and determining laser power. For all such  
 421 experiments the laser was turned on 100 ms pre stimulus onset and turned off 100 ms stimulus offset (orange shading).  
 422 Spontaneous or non-auditory driven activity in 3 periods were used, OFF1, ON and OFF2, each 100 ms long and were as  
 423 depicted. For sequences stimulus onset and offset were onset of first syllable and offset of the last syllable of the  
 424 sequence. B) Histograms of modulation index of all cases show significant modulation of spontaneous spiking by light (*left*  
 425 and *middle*, mean: red arrow), and the histogram to the *right* shows comparisons of spontaneous activity pre and post light  
 426 on. C) Scatter plot to compare single syllable mean responses in SN and SR during SOM silencing paired with sequences  
 427 (AF-OP) and after the period of pairing (AF-AFOP), as in Fig. 2D and Fig. 4C). D) Similar plot as in Fig. 4E, with AF-BFEx, AF-  
 428 AFEx (from Fig. 4E) and additionally AF-OP and AF-AFOP.



429 neurons, obtained cross breeding of JAX-21188(Ai40D) and JAX-13044 (SST-IRES-Cre) were used (Fig.  
430 7A). First we decided the power level of the 589 nm laser for ArchT-EGFP activation to silence SOM  
431 INNs. We used the highest power level at which the spontaneous activity post-light off recovered to  
432 initial spontaneous activity pre-light on, while producing an average increase in spontaneous with  
433 light on in the pre-stimulus period (Fig. 7A,  $n=6$  mice,(3 female, 3 male)  $n = 51$  units, noise at 5  
434 intensities(55-95db SPL), see Methods<sup>62</sup>. There was no significant difference in spontaneous activity  
435 between pre-light on and post-light off periods (Fig. 7B *right, paired ttest, p>0.05*), with increased  
436 light-on-spontaneous activity (Fig. 7A, green box, Fig. 7B *left and middle*).

437 We performed optogenetic silencing of SOM INNs at the above power over a period encompassing  
438 presentation of the 20 sequences (both SN and SR, 100 ms before to 100 ms after the stimulus as in  
439 Fig. 7A, see Methods) for total 100 presentations (5 for each SN and SR) to test our hypothesis of  
440 involvement of SOM neurons. We found that the relationship of responses of single syllables in SN  
441 and SR during SOM silencing (AF-OP, Fig. 7C, *left*) were similar to AF-BFEx except the reduced  
442 responses of H in SN compared to SR was now the same (Fig. 2C, *middle*). We also probed for longer  
443 term plastic changes induced by the pairing of SOM INN turning off (effectively disinhibiting EXNs to  
444 which they primarily project)<sup>36</sup> and simultaneous sound stimulus (SN and SR) presentations. We  
445 found that the comparative responses to each of the single syllables in SN and SR following the  
446 above pairing (AF-AFOP, see Methods) were largely the same as AF-BFEx, AwF-BFEx and AF-AFEx  
447 (Fig. 2C and Fig. 4C, Fig. 7C, *right*). No distinct switch in preference between SN and SR was  
448 observed. Similar observations were made with transitions common to SN and SR in female mice  
449 before and after exposure (Fig. 3 BFEx, Fig. 4D AFEx) and during and after optogenetic silencing of  
450 SOM INNs (Fig. S5), with no distinct switching between SN and SR. We then tested the idea of  
451 plasticity to selectivity in sequences. For both groups AF-OP and AF-AFOP, there was a significant  
452 increase in selectivity to SN compared to the AF-BFEx group and was same as that of the AF-AFEx  
453 group of mice (Fig. 7D, ANOVA, $p<0.0001$ ,  $p<0.0001$ ,  $p<0.0001$ ). The mean selectivity to SR remained  
454 the same as the AF-BFEx group. In the subgroup of units from AF-BFEx mice in which SOM INN  
455 silencing based pairing was performed, the mean selectivity of SN was the same as AF-BFEx however  
456 there was a small reduction in selectivity to SR in the same population (median 4 % lower) indicating  
457 an effect of rise in selectivity to SR during and after pairing. Thus SOM inhibition during sequence  
458 presentation is capable of inducing rapid plastic changes in coding of entire sequences without  
459 changing coding of the component syllables and disyllables. We thus hypothesize that during the  
460 activity dependent plasticity occurring in naïve females, VIP mediated inhibition of SOM could  
461 underlie the plasticity in sequence selectivity.

462

## 463 Discussion

464 Our work is the first study that investigates selectivity of A1 single neurons to sound sequences as a  
465 whole and not only by its component tokens and dyads<sup>29,35,63,64,65</sup>. We also find experience  
466 dependent plasticity in selectivity to mouse vocalization sequences as a whole, unlike what is  
467 observed with maternal plasticity in encoding of single syllables of mouse pup calls<sup>29</sup>. Multiple  
468 studies have shown context specific vocalizations in adult male mice<sup>11,13,39</sup>. Variation in USVs in  
469 different contexts have primarily been characterized in terms of spectrotemporal content and basic  
470 call features like frequency of types of calls, duration and length of bouts among other such features  
471 <sup>66,12</sup>. However, A1 coding of entire sequences are lacking, although, structure in call sequences in  
472 adult male mice<sup>39,43,46</sup> and pups<sup>42,47</sup> have been known to exist.

473 Multiple methods have been used to evoke adult male USVs relevant for social interaction with  
474 females<sup>11</sup>. We develop a sequence of steps in male female interaction over days (Fig. 1A) from which  
475 we extract male USV sequences that are highly informative using information theoretic methods.  
476 Although in the above interactions females may also vocalize their contribution is minimal<sup>67,68</sup> and

477 primarily with low frequency harmonics<sup>69,70</sup> not considered in our data. The main factor that warrant  
478 further investigation of whole sequence coding are our observation of significantly higher preference  
479 of female mice for the above extracted SN over the designed SR (Fig. 1). The SR was designed to  
480 have the same frequency of occurrence of each syllable type as found in our male female interaction  
481 protocol (Fig. 1C). Both SN and SR were constructed with the exact same syllable waveforms and  
482 repetition rate, removing any spectrotemporal cues other than syllable order to differentiate SN and  
483 SR. Control experiments with number of syllables in SR to match that of SN also showed the same  
484 results as a fixed number of syllables in SR, in terms of preference of females for SN (Fig. 1F).  
485 The sequences extracted and used in our study are based on predictability from syllable to syllable.  
486 A set of such syllables combined into structured sequences as above, is capable of providing more  
487 information than the same syllables produced in isolation<sup>20</sup>. In many species like the songbird<sup>2</sup>  
488 acoustic communication takes the form of ordered sequences especially with more flexible vocal  
489 production. Sequences contribute to information-rich communication, as is the case for human  
490 speech as studied through prediction of letters in English text<sup>20</sup>. Recent work with machine learning  
491 have been able to connect single mouse USV syllables with particular behaviour<sup>71</sup> and also extracting  
492 information about identity, sex and context<sup>72</sup>. However, similar approaches have not been taken for  
493 mouse USV sequences of syllables. While we do not claim that each sequence may convey different  
494 meaning or information, but the results do provide the fundamental bases required for sequence  
495 based communication. Future studies need to combine more refined behaviour to link sequences  
496 with behaviour and further understand encoding and plasticity of their representation at single  
497 neuron and network level.  
498 Long term as well as rapid alteration of representation of sounds in mouse A1, with experience, like  
499 maternity<sup>28,29</sup>, learning based on reward or fear<sup>32,30</sup>, developmental environment<sup>55,73,74</sup> and artificial  
500 involvement of subcortical and higher order structures<sup>75,76</sup> have been shown for single tokens of  
501 natural as well as artificial sounds. However, our study shows social experience dependent change in  
502 selectivity to behaviourally relevant sequences as a whole and not of its parts (Figs. 2-6). Our results  
503 show that A1 responses of single tokens and dyads depend on context, but their relative selectivity  
504 do not change with the above experience (Figs. 2-6) while selectivity of single neurons for the whole  
505 sequence is altered based on the degree of the experience (Fig. 4F). Integration of acoustic  
506 components into a single percept across frequency and at least partially overlapping in time is well  
507 known<sup>30,34</sup>. However feature integration to obtain a holistic representation of sound tokens over  
508 non-overlapping in time is surprising and not well understood. Such integration likely involves very  
509 long time scales of adaptation known in A1<sup>77,78</sup>, long time constant recursive connections and  
510 inhibitory inputs<sup>79</sup>. Previous work<sup>52</sup> has looked into very long time scale adaptation<sup>78</sup> of entire sound  
511 sequences and change in their representation over time from repeated presentations and show  
512 recurrence in EXNs and SOM to play a role. Here we find that optogenetic silencing of SOM INNs  
513 paired with sequence presentations alter sequence selectivity as with social experience with largely  
514 no change in relative selectivity of single neurons to syllables.  
515 We hypothesize that the above silencing of SOM INNs in naïve female mice during the social  
516 experience occurs through VIP neuron activation triggered by the interaction with the male. SOM  
517 INNs are known to disinhibit EXNs upon activation of VIP neurons<sup>36</sup>. SOM neurons respond less  
518 selectively to SN compared to SR before exposure and EXNs behave in the opposite manner. Thus  
519 higher responses to EXNs to SN compared to SR coupled with disinhibition by SOM can drive the  
520 observed plasticity. Higher selectivity to SR before exposure of SOM INNs would reduce the  
521 disinhibition when SR is presented and thus produce less plastic effects. However, activation of VIP  
522 during the said social experience is unknown and needs to be explored. The likely candidates are  
523 inputs from BLA(Basolateral Amygdala), hypothalamus, Ventral tegmental Area (VTA) or prefrontal  
524 cortex because of their involvement in mating behaviour<sup>80,81,82</sup>.  
525 Our results take us a step further in the direction of establishing mouse models of vocal  
526 communication and to study disorders like ASDs and other neurobiological disorders with social  
527 communication deficits like intellectual disability and aphasia. Our study also invites reinvestigation

528 of many aspects of mouse communication and even vocal learning<sup>9,10</sup> and established ideas of  
529 innateness of mouse USVs, by considering sequences of syllables.

530

## 531 **Methods**

### 532 **Animals**

533 All mice used in the study were 8–12 weeks old at the time of experiments. All procedures  
534 pertaining to animals used in the study were approved by the Institutional Animal Ethics Committee  
535 (IAEC) of the Indian Institute of Technology Kharagpur. Mice, *mus musculus* (age and sex identified in  
536 individual cases), are reared under a 12/12 h light/dark cycle at a temperature of 22–25°C with *ad*  
537 *libitum* access to food and water. All vocalization and extracellular recordings are done on C57BL/6J  
538 strain mice. For two-photon imaging, the PV-ires-Cre [JAX 08069] and SOM-ires-Cre [JAX 13044]  
539 driver lines are crossed Ai95(RCL-GCaMP6f)-D[JAX 24105] to label inhibitory neuronal types with  
540 green fluorescence expression. Recordings from excitatory neurons are done by using C57BL/6J-  
541 Tg(Thy1-GCaMP6f) [JAX 24339].

### 542 **USVs Recording**

543 To record adult male mouse USVs, initially a male mouse was kept in a wooden recording cage  
544 (12x18x15 cm) placed in a sound isolation booth (Industrial Acoustics, New York, NY) alone for 5-10  
545 minutes. No vocalizations were observed in the above condition. A female was introduced in the  
546 same setup with a separator in between (5-10 minutes), followed by removal of the mesh in  
547 between them. USVs were emitted by the male in both the latter cases. After 7-10 days, when the  
548 male was placed alone in the recording set up, it vocalized in the absence of the female. Final  
549 recordings were made starting from the above stage and analysed further. USV recordings were  
550 collected using the protocol depicted in Figure 1(A). Context1: The male mouse alone (M); Context2:  
551 The male mouse with a female present in view, separated by a mesh (MSF); Context3: As context2  
552 without the separator. The above context specific USV recordings were made for at least 5 days.  
553 Acoustic signals were recorded with a free-field microphone and amplifier (1/4" microphone, Model  
554 4939, Bruel and Kjaer, Naerum, Denmark) with flat frequency response up to 100 kHz, and slightly  
555 diminishing sensitivity at higher frequencies. The acoustic signals were digitized at 250 kHz with 16-  
556 bit resolution collected with National Instruments DAQ. Recorded signal time waveforms and  
557 spectrograms were displayed in real-time on a computer with open access bioacoustics software,  
558 Ishmael.

### 559 **Vocalization Recording Analyses**

560 All our USV analyses were performed in MATLAB (Mathworks) and have been presented in detail  
561 earlier<sup>42</sup>. In brief, each wav file was divided into 5 second epochs. Background noise was eliminated  
562 bandpass filtering with a Butterworth of order 8, removing frequencies outside the 20kHz and  
563 120kHz range. Syllable segmentation was performed by first calculating the Short Term Fourier  
564 Transform (STFT) of each epoch with 1024 length Hamming window, overlap of 75%. Syllables were  
565 identified by calculating the power concentrated in each frame normalized by the average power in  
566 all the frames and median filtered over 30 ms windows. Peaks in power over time were detected by  
567 using peak detection. Syllables were classified into 5 categories<sup>42</sup>, Noisy (N-type) syllables which has  
568 a broad energy content, syllables with harmonic content (H-type), based on the presence and  
569 absence of discontinuities, syllables are again classified into three classes, namely S-type  
570 (continuous contour of spectral energy), Jump, J-type (a single discontinuity) and, Other, O-type

571 (more than one discontinuity)(Fig. 1B). All subtypes of syllables are also present, as observed in  
572 other studies<sup>12,13,83</sup>. However, we used only pitch jump as the primary classification criteria based on  
573 Holy and Guo<sup>43</sup> to restrict the number of broad classes enabling our analyses requiring large sample  
574 sizes. Moreover, sudden discontinuities in pitch are also inherently tied to the vocalization  
575 production machinery.

#### 576 **Identification of high probability sequences in different contexts**

577

578 The significance of occurrence of each syllable at different positions given the previous syllables was  
579 computed for each context. For the syllable in the first position in a bout, the probability of  
580 occurrence of each syllable type in the beginning of the bout was obtained and compared to the  
581 equally likely probability of occurrence of each syllable type. Syllables with higher (90% confidence)  
582 probability of occurrence than overall were considered as significant. The process was continued for  
583 each of the subsequent positions keeping the previous syllable types fixed until there were no  
584 significant syllables further observed. In the above manner we find sequences that occur above  
585 chance and render structure in different contexts.

#### 586 **Surprise Analysis**

587 Surprise was computed by calculating the dissimilarity between the posterior and prior distributions  
588 of occurrence of syllables in sequences (length 3 - 7) using KLD<sup>44</sup> as the sequences used as stimuli  
589 had minimum 3 and maximum 7 syllables. Surprise was defined by the average of the log-odd ratio<sup>48</sup>

$$590 \text{ Surprise}(D, k) = \sum_{\forall k} P\left(\frac{M}{D}\right) \log \frac{P\left(\frac{M}{D}\right)}{P(M)}$$

591 where  $P(M)$ , the prior probability ( $D$ ), the posterior probability and  $k$ , the space model of the  
592 sequences.

#### 593 **Sequence Construction and Auditory Stimulus Delivery**

594 The stimulus consisted of 12 random sequences drawn randomly based on the probability  
595 distribution of syllables (Fig. 1C) obtained in 3 contexts (4 sequences from each context). The  
596 remaining eight sequences were the high probability, high surprise natural sequences emitted in  
597 different contexts. Between each syllable, a silence of 90 ms was considered based on the mean of  
598 the ISS distribution (Fig. S1C). All stimuli are generated using custom-written software in MATLAB  
599 (Math-works) and D/A board (National Instruments), attenuated using a TDT PA5 (Tucker Davis  
600 Technologies, TDT), generated using TDT EC1 calibrated speakers (driven with TDT ED1 drivers), and  
601 delivered through a speaker kept 10 cm away from the contralateral ear. The acoustic calibrations,  
602 performed with microphone 4939 (Brüel&Kjær), of the ES1 speakers (TDT) in the sound chamber,  
603 showed a typical flat (95 dB) calibration curve from 4 to 60 kHz; 0-dB attenuation on PA5. Each of  
604 the syllables in the sequence had an onset and offset of 5ms ramp and had root mean square (rms)  
605 matched. All awake and anesthetized recordings were done at 65-75 dB SPL and 75-85 dB SPL  
606 respectively. Responses with usually 5 (rarely 4 or 6) repetitions were presented in randomized  
607 order and used for further analysis. Each stimulus onset was preceded by a baseline of 500ms and  
608 had an inter trial interval of 5 s.

#### 609 **Two choice free access/preference task: Natural vs Random**

610 All behavioural tests were performed inside a soundproof anechoic chamber under dim red light.  
611 The test cage was an acrylic rectangular box (30-cm long × 20.5-cm wide × 20-cm tall). Two tubular  
612 ports (9 cm long) terminated with a mesh on one end, each 5cm in diameter, were attached to the  
613 test cage opposite to each other, one to the right corner (RS) and the other to the left corner (LS)  
614 (schematic of the set up shown in Fig. 1F) with a speaker beyond the mesh end of the ports. Before

615 starting a session, the entire test cage was wiped with 70% ethanol. There were five sessions each of  
616 5 min, first 4 of them are shown in Fig. 1F (S1 to S4). In S1 the test female mouse was allowed to  
617 explore the test cage; in S2 SN (say from RS) and SR (from LS) were played alternatively with an inter  
618 stimuli gap of 5s; in S3, no stimulus; S4 was same as S2 with corners swapped for SN (from LS) and  
619 SR (from RS); in the final session again no stimulus was played. A webcam (Logitech C925e) was  
620 fitted 35 cm above the center of the test cage from the base and the entire duration of the 5  
621 sessions were recorded at 15 frames/second, 1411 kbps, using Logitech software.

## 622 **Calculation of Joint Distributions and MI Based Dependence**

623 Transition probabilities were computed by estimating the joint probability distribution. Krichevsky  
624 and Trofimov (KT) correction was applied to take care of combinations leading to '0' values. Mutual  
625 Information or MI, between 2 random variables X and Y, quantifies total dependence between the  
626 two random variables<sup>44</sup> and can be computed from the joint distribution  $P(X, Y)$  and its marginal  
627 distributions  $P(X)$  and  $P(Y)$  as

$$MI(X; Y) = \sum_{\forall X} \sum_{\forall Y} P(X = x, Y = y) \log_2 \frac{P(X = x, Y = y)}{P(X = x)P(Y = y)}$$

628  
629 Since MI were sensitive to bias<sup>45,84</sup>, the results can be erroneous provided the limited data size. The  
630 above problem was circumvented through bootstrap removal of bias and comparing the MI  
631 estimates with scrambled syllable order in sequences of vocalizations to get only significant  
632 estimates of MI.

## 633 **Removal of Bias in Mutual Information Estimates and Significance Analysis**

634 Bootstrap debiasing was used to remove bias in MI estimates<sup>42,45</sup>. A resampling technique where the  
635 bootstrap dataset has the same number of elements as the original one was employed to debias the  
636 estimates get an estimate of the bias perform debiasing and obtain confidence intervals. We  
637 compare the lower confidence interval with upper confidence interval of the estimate of '0' MI  
638 obtained similarly as above but now by not keeping the transitions intact, that is by randomly  
639 scrambling the sequences which leads to the estimates of '0' MI and its confidence interval from the  
640 same data set with same number of syllables and other statistics intact except the order of the  
641 syllables in a sequence. When the confidence intervals of MI of the data and the scrambled data did  
642 not overlap, the estimated MI was considered to be significant. Thus we minimize the possibility  
643 (<5%) of spurious MI due to limited data size and variability.

## 644 645 **Calculation of Kullback Leibler Divergence (KLD) between distributions**

646  
647 The proximity among the probability distributions was quantified using  $KLD$ <sup>44,45</sup>, an information  
648 theoretic distance metric which makes no assumptions about the statistics of the data. To compute  
649 KLD between the distributions P and Q taking on values over the same set (in our case syllables  
650 produced by three different contexts taking values of different syllable types with probabilities  $P(x)$   
651 and  $Q(x)$ , x being a syllable type, or the syllable to syllable transitions produced by the two groups)  
652 was computed as follows:

653

$$KLD(P||Q) = \sum_{\forall X} P(x) \log_2 \frac{P(x)}{Q(x)}$$

654 We performed debiasing of KLD using bootstrap resampling calculated significance in the same way  
655 with 95% confidence intervals as with MI (above).



## 656 **Tracking Mouse Movement**

657 The videos of the 5 sessions monitoring the behaviour of mice in the syllable sequence preference  
658 test were analysed using custom code written in MATLAB. We used the MATLAB computer vision  
659 toolbox function '*kalmanFilterForTracking*' for tracking the position of the mouse in the test  
660 chamber in every video frame during the 5 sessions. When the mouse was not visible in the  
661 chamber, when the mouse was inside a port, the position of the mouse was assigned to the last  
662 observed location, always near the entry point of the port. If in the initial frames the mouse was not  
663 visible, the mouse location corresponding to all such initial frames was assigned to the co-ordinates  
664 of the position the mouse was first detected. A bounded tracking was done, by selecting a region of  
665 interest covering the entire test floor and the entire area outside it was never assigned as a possible  
666 mouse location. Based on the manually selected co-ordinates of the four corners of test chamber  
667 the area was then divided either into 2 equal halves corresponding to RS and LS respectively or 3  
668 equal parts corresponding to RS, LS and a central neutral region. Based on the tracked co-ordinates  
669 of the mouse the percentage of time spent towards each corner (RS or LS) was quantified for the  
670 different sessions and used for statistical comparisons.

## 671 **Surgical Procedure for in vivo recordings**

672 The mouse is anesthetized in an induction chamber with isoflurane. It is placed on a heating pad (for  
673 maintaining body temperature), and isoflurane inhalation is maintained via a nose mask. An incision  
674 is made in the scalp along the midline. The region of interest is drilled using a micro drill, and an  
675 electrode is implanted. It is cemented using a super bond. The animal is habituated for 5-7 days. The  
676 recording is done in a single-walled sound-attenuating chamber. On experimental days, the animal is  
677 placed securely into a foam body mold. The headpost is attached to a custom-made stereotaxic  
678 apparatus. For imaging, initially the mouse is injected with 0.1 ml dexamethasone on the thigh. Once  
679 the animal is stabilized on anaesthesia, hair remover cream is applied to the area of interest. After  
680 leaving it for a few minutes, it is cleaned. The remaining procedure remains the same as described  
681 above. For 2 photon imaging the craniotomy is sealed with a coverslip.

## 682 **In vivo extracellular recordings**

683 Extracellular recordings were performed using a tungsten microelectrodes array (MEA) of  
684 impedance 3–5 Mohm (MicroProbes); 4x4 custom-designed metal MEAs with an inter electrode  
685 spacing of 125  $\mu$ m were used. The array was advanced slowly to a depth of 200-350  $\mu$ m from the  
686 surface into the ACx using a micromanipulator (MP-285, Sutter Instrument Company). The  
687 electrodes were allowed to settle for 15-20 min before the stimulus presentation was started.  
688 Signals were acquired after passing through a unity gain head stage (Plexon, HST16o25) followed by  
689 PBX3 (Plexon) preamp with gain of 1000, to obtain the wideband signal [used to extract local field  
690 potential (LFP), 0.7 Hz to 6 kHz] and spike signals (150 Hz to 8 kHz) in parallel and acquired through  
691 National Instruments Data Acquisition Card (NI-PCI-6259) at 20-kHz sampling rate, controlled  
692 through custom-written MATLAB (MathWorks) routines. Data collection lasted for < 2 weeks, with  
693 ~1-2 hour long sessions every day for the electrode implanted animals in the awake state. Units  
694 collected on each day from the implanted recording electrodes were considered as separate units.  
695 All sound tokens presented in all kinds of stimuli had 5-ms rise and fall times.

## 696 **Analysis of in vivo extracellular recordings**

697 Spike sorting was done offline in custom-written MATLAB scripts. Data were baseline corrected and  
698 notch filtered (Butterworth fourth order) to reject any remnant power supply 50-Hz oscillations.).  
699 Single-unit spike times were obtained from the acquired spike channel data using threshold crossing  
700 and spike sorting with custom-written software in MATLAB. Mean spike rate was calculated by

701 taking the mean of the neuronal firing over the stimulus duration +20ms. A neuron was considered  
702 to be significantly responding if the spontaneous activity (200ms before stimulus onset) was  
703 significantly different from the neuronal activity (unpaired t-test<0.05).

704 All the units which significantly responded for any syllable have been considered for calculating the  
705 neuronal selectivity. Mean spike rate is calculated for each of the 20 stimuli corresponding to their  
706 duration. For each neuron, then selectivity is calculated by

$$\text{Neuronal Selectivity} = \frac{\text{mean spike rate} - \min(\text{mean spike rate})}{\max(\text{mean spike rate}) - \min(\text{mean spike rate})}$$

707 All the 8 natural stimuli are clubbed together by calculating their mean response across all neurons.  
708 Similarly, the mean neuronal selectivity is obtained for random sequences.

709

## 710 **Wide Field Calcium Imaging**

711

712 After the animal preparation for chronic window implant, for wide field imaging, cortical images  
713 were taken using X-citeQ120 blue light (450-490 nm) excitation. A 4x0.13 NA objective (Olympus)  
714 was focused 200 microns below the cortical surface. The green emission fluorescence (500-550 nm)  
715 was collected onto a CCD camera at ~20 Hz.

716 For identifying the Auditory Cortex (ACx) regions, a significant change in fluorescence (df/f) was  
717 computed by subtracting and normalizing each frame by the mean response of the baseline frames.  
718 The pixels that have significant df/f retain their values (unpaired t-test). A Gaussian filter was used to  
719 smooth the df/f with a standard deviation of 2, normalized by the absolute maximum. A binary  
720 image is generated based on the pixels having values greater than 0.5. Using the inbuilt function of  
721 Matlab bwboundaries 8-connected neighborhood boundaries are drawn for different frequencies.

722

## 723 **Two- photon Calcium imaging**

724

725 For two-photon imaging, Ultima IV, Prairie Technologies laser scanning microscope with a Spectra  
726 Physics Insight Ti-Sapphire mode-locked femto-second laser was used. Cells were imaged using a  
727 20X, 0.8NA (Olympus) water immersion objective at depths of usually 200–350  $\mu\text{m}$  from the cortical  
728 surface at an excitation wavelength of 860-920nm. Full frame images were acquired at a resolution  
729 of 512x512 pixels. The laser power was adjusted from 50mW to 80mW. Frames in the region of  
730 interests (120-150  $\mu\text{m}$  x 300-350  $\mu\text{m}$  with 1.16  $\mu\text{m}$  pixel size) were imaged at ~4-10 Hz (~250ms  
731 frame period, 4  $\mu\text{s}$  dwell time).

732

## 733 **Analysis of 2-photon imaging data**

734

735 2-photon imaging analysis was performed using custom codes written in MATLAB (Mathworks).  
736 Imaging sequences were aligned by performing X-Y drift correction. Cells were selected manually by  
737 selecting the centre point of the cell on the motion-corrected mean images. ROI (5  $\mu\text{m}$  radius) were  
738 drawn based on the cell centres. Raw fluorescence signals over time (f) of the selected ROIs across all  
739 frames were extracted. For each trial, relative fluorescence was computed by using  $df/f_0 = (f-f_0)/f_0$ ,  
740 where  $f_0$  corresponds to baseline fluorescence. Baseline fluorescence amplitude was estimated by  
741 calculating the mean of fluorescence values over all the frames preceding stimulus, except the first 3  
742 frames, which was either 4 or 6 frames.

743 A neuron was considered responsive to a stimulus if the mean of three frames of the mean  
744 fluorescence trace (calculated from stimulus repetitions) before the stimulus onset is significantly  
745 different from moving three frame average after the stimulus onset (unpaired t-test,  $p < 0.05$ ).  
746 Baseline distribution was obtained from all the pre-stimulus 3 frames (all stimuli and all repetitions,  
747 usually 100). The total number of frames considered for each stimulus encompassed the stimulus  
748 duration and an additional 0.5s after the stimulus. We only considered significant positive going  
749 responses and thus FDR<2.5%. The response of a neuron to a sequence was calculated based on

750 mean  $df/f$  of all frames from stimulus start to 0.5 ms post stimulus end. Selectivity to each of the 20  
751 stimuli of a neuron was based on the above response and calculated as with single units.

### 752 **Calculation of selectivity based on spontaneous activity for optogenetics**

753 For photo inhibition of SOM (JAX 21188XJAX 13044), we activated ArchT via light pulses of 589 nm<sup>85</sup>  
754 through an optical fibre of 200 micron, 0.5 NA. The power at the tip is 30mW. Light pulses are  
755 presented 100 ms before auditory stimulus onset and last for stimulus duration+100 ms.

756 Reversibility due to photo inhibition of SOM is tested by comparing the mean spontaneous activity  
757 with ( $W$ ) and without ( $WO$ ) the laser being on. The formula used for calculating selectivity

$$\text{Selectivity for spontaneous activity} = \frac{W - WO}{W + WO}$$

758

759

760

761

762

763

764

765

766

767

768

769

770

771

772

773

774

775

776

777

778

779

780

781 **Figures**

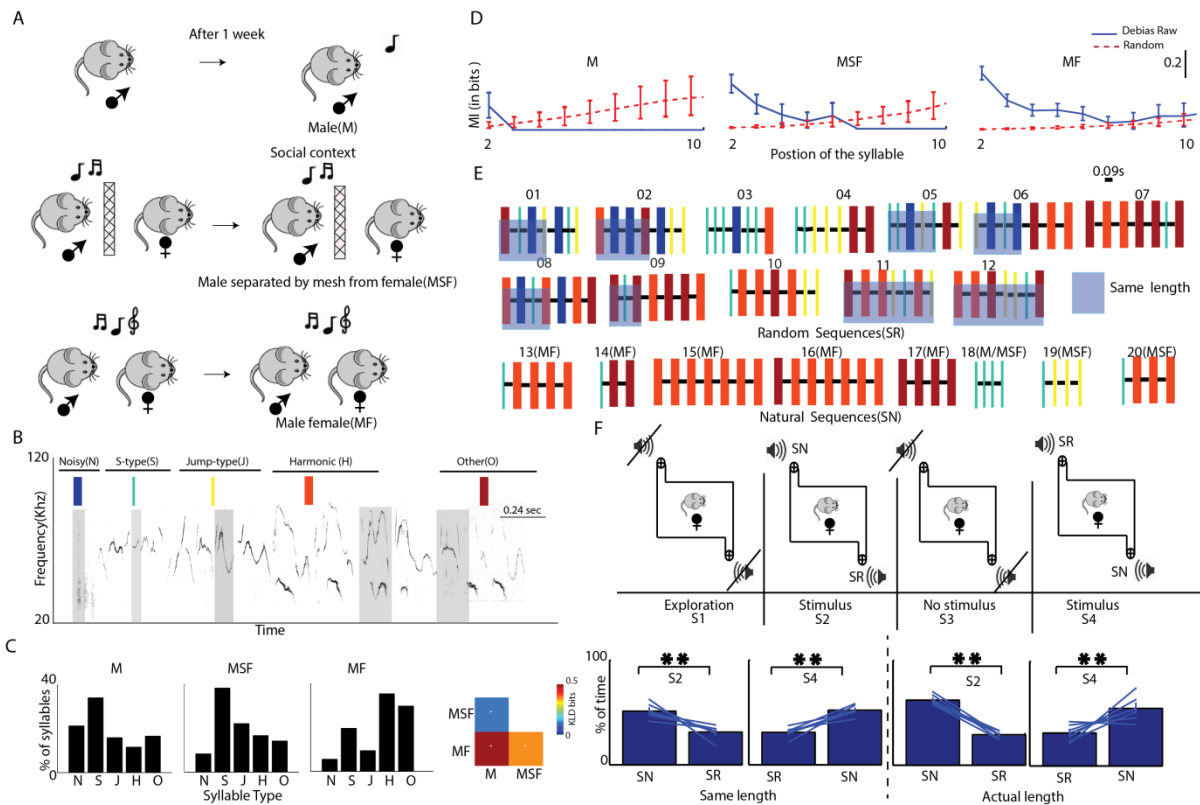

782

783 **Figure 1. Naive female mice prefer natural sequences emitted by male mice during social exposure**

784 **A**) Schematic depicting the three social contexts (M, MSF and MF) in which male mouse vocalizations  
 785 were recorded. **B**) Examples of spectrograms of representative syllable types, with one in each type  
 786 highlighted with shaded background. Different syllable types are depicted with different color bars  
 787 with widths denoting respective durations. **C**) Probability distributions, *pmfs*, of the different syllable  
 788 types in the 3 contexts shown as bars with percentage of syllables. **D**) Plots of MI,  $I(S_i; S_j)$  with  $i=1,2 \dots$   
 789 10 in the 3 different contexts in blue with 95% CIs. Red plots, with 95% CIs, show the expected  
 790 extent of '0' MI estimate from the data after scrambling order of syllables. Lack of overlap of the CIs  
 791 (red and blue) indicate significant MI. **E**) The set of sequences created for SR and extracted for SN  
 792 are depicted with the colored bars, as in B. The light blue background in a subset of the SR indicates  
 793 the sequences for same length case. The SNs in 3 different contexts are identified above each SN. **F**)  
 794 *Top row*: S1-S4 depicts the 4 sessions recorded with S1 and S3 having no sounds played. A fifth  
 795 session S5, not depicted, was also recorded in which no stimulus was played. S2 and S4 have sounds  
 796 played from speakers as indicated. *Bottom row*: The two bar plots to the left of the dashed line show  
 797 bars indicating time spent on side of SN and SR in S2 and S4, in equal length case. The same for the  
 798 SR having 7 syllables is shown to the right of the dashed line.

799

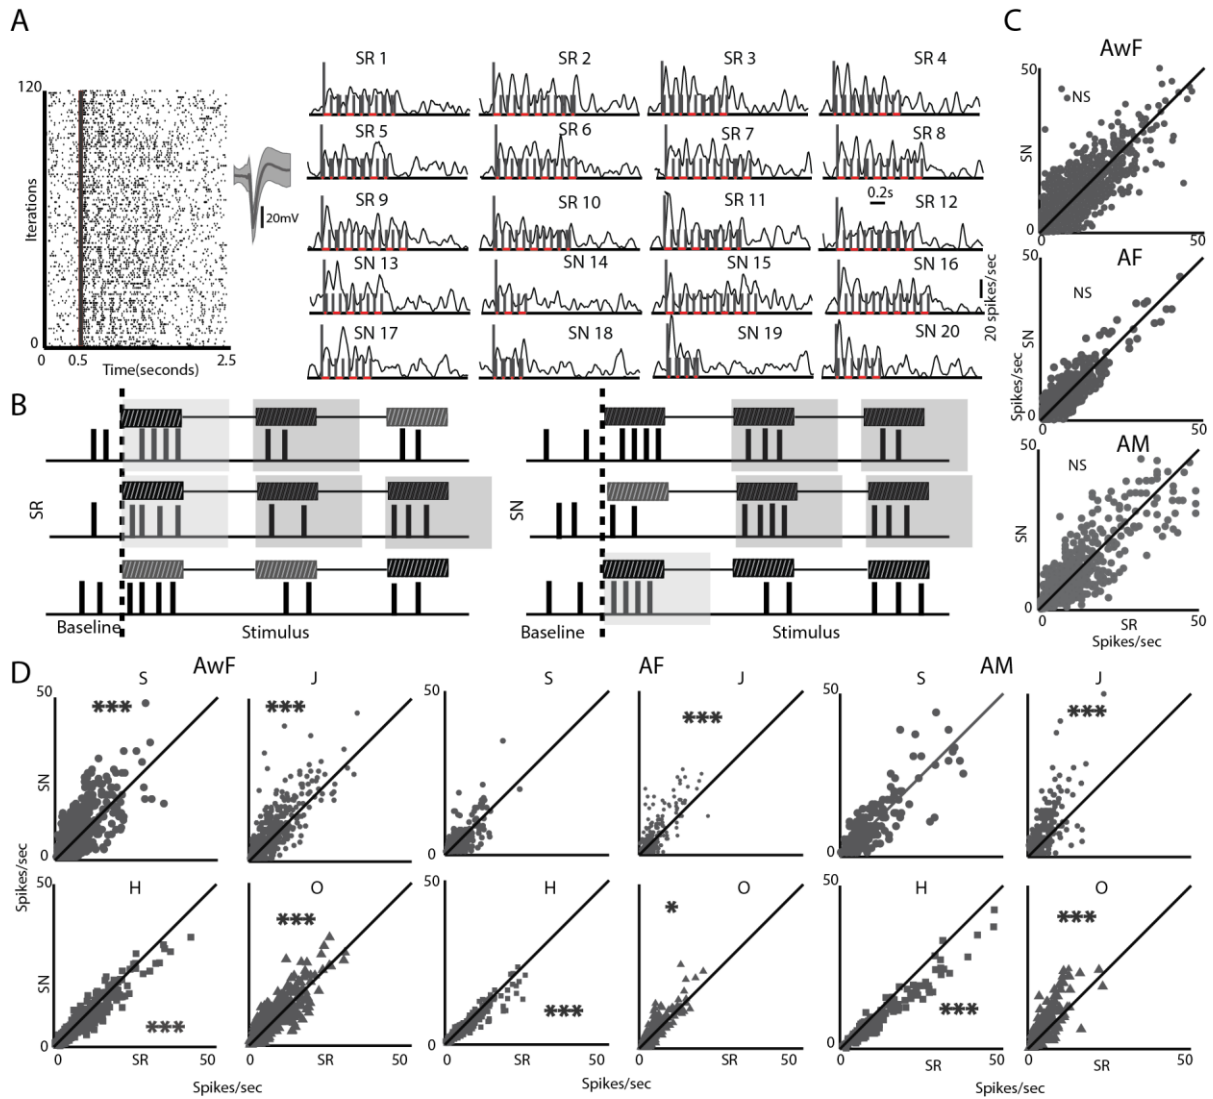

800

801 **Figure 2. Coding of single syllables in mouse A1 depends on context**

802 A) Representative dot raster plot of single unit spiking responses to SN and SR presented in pseudo  
 803 random order (spike shape to the right). Smoothed PSTHs of the same unit for each stimulus  
 804 sequence is shown with stimulus start (tall line) followed by lines marking start and end of each  
 805 subsequent syllable. B) Schematic for calculation of responses to common syllables in the first  
 806 position and within the sequences in SN and SR. C) Scatter plots show comparison of mean response  
 807 rates of all common first syllables in SN and SR in 3 groups of mice, AwF, AF and AM. D) Scatter plots  
 808 comparing mean response rates of common syllables (identified by solid symbols, S: large circle, J:  
 809 small circle, H: square, O: triangle) in SN and SR, excluding occurrence in the first position for the  
 810 same groups in C.

811



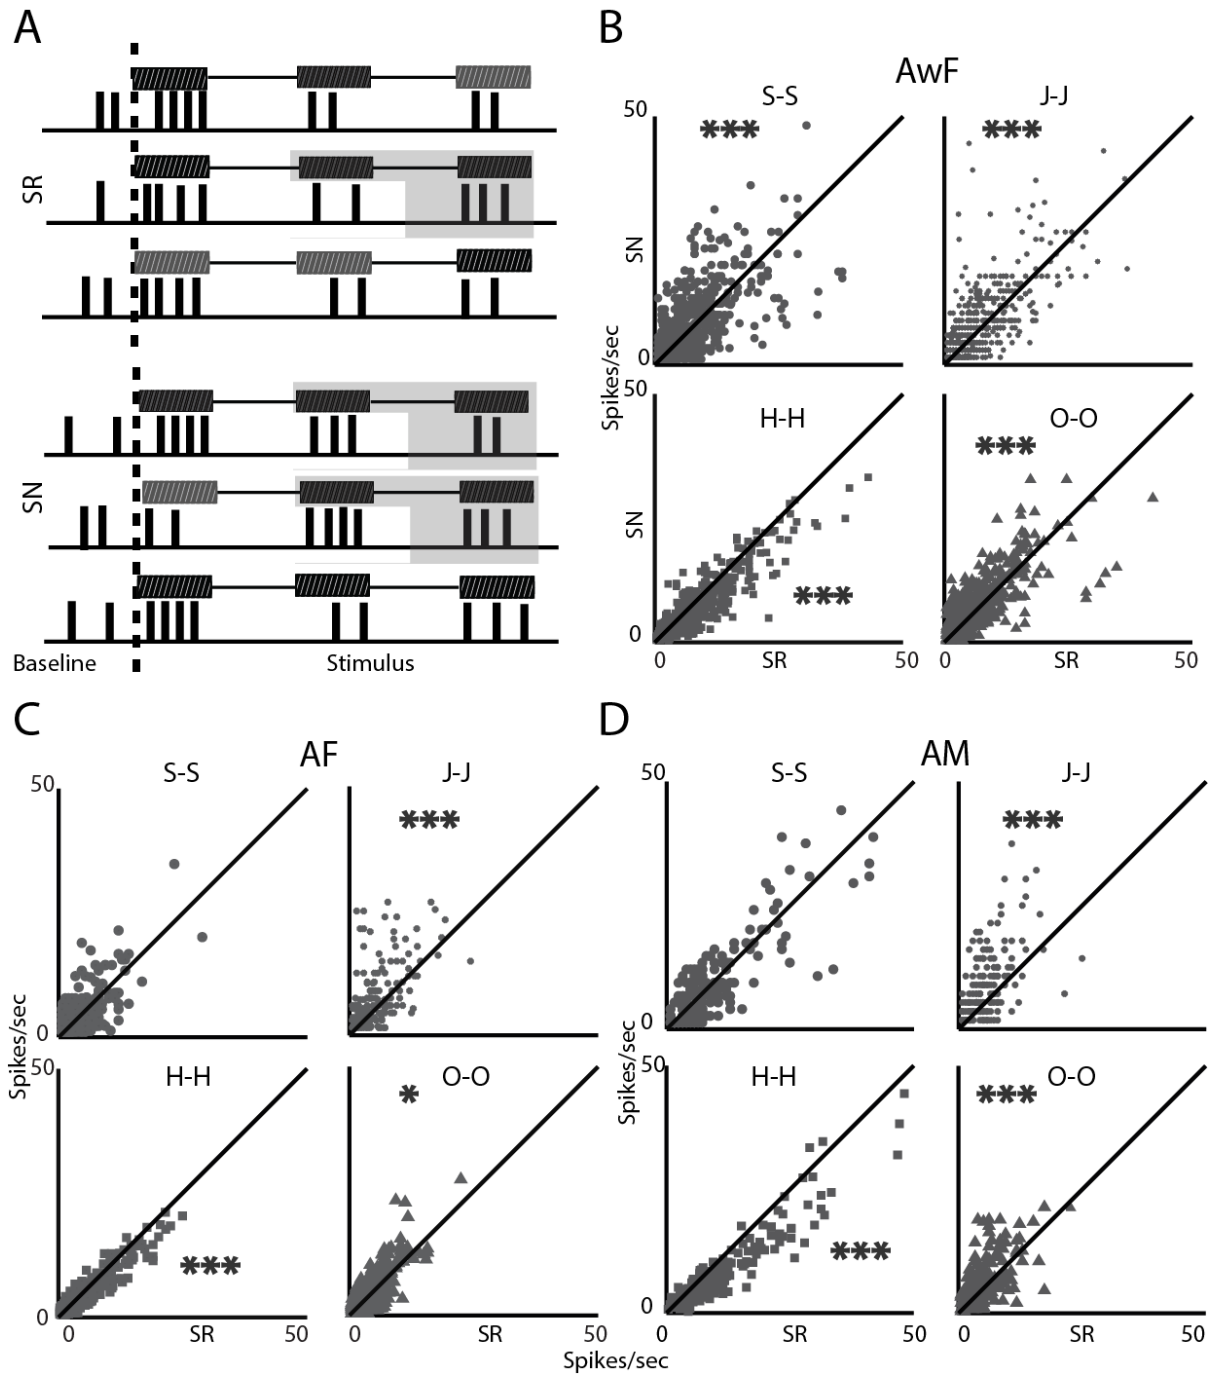

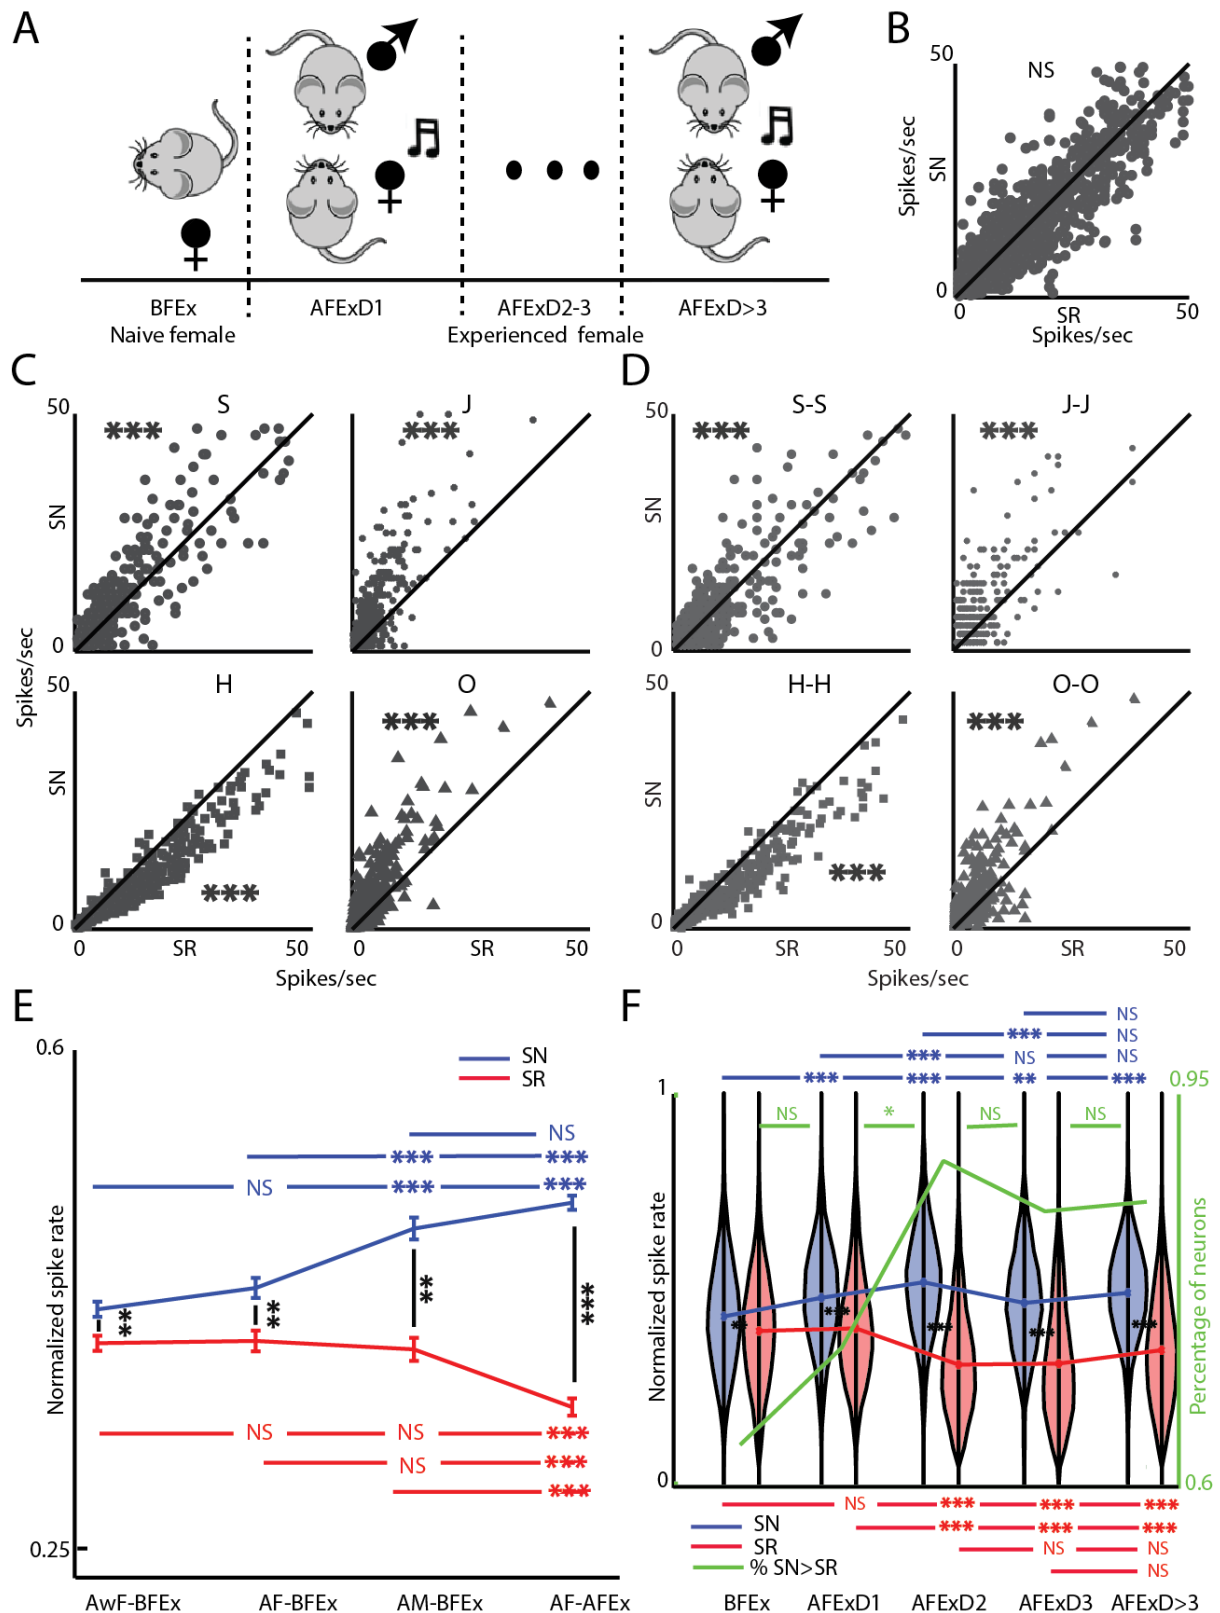

818

819 **Figure 4. Plasticity in single units' selectivity to entire SN sequences and not its components**

820 A) Schematic of social exposure protocol of female mice with male mice over days. B) Scatter plot for  
 821 comparison of mean response rates to the common first syllables in SN and SR, following exposure.  
 822 C-D) Scatter plot to compare mean rate responses to common syllables (C) and disyllables (D) as in  
 823 Fig. 2D and Fig. 3 respectively. E) Comparison of mean overall selectivity to sequences in SN to that

824 in SR and comparisons across groups before exposure (AwF-BFEx, AF-BFEx and AM-BFEx) and after  
825 exposure (AF-AFEx). F) The mean selectivity to SN and SR in AF-BFEx in E) are compared with  
826 selectivity to SN and SR over days of exposure and within days of exposure. Violin plots for each day  
827 show the variability of the data sets. Thick green line shows percentage of units with higher  
828 selectivity to SN than to SR (axis to the right).

829

830

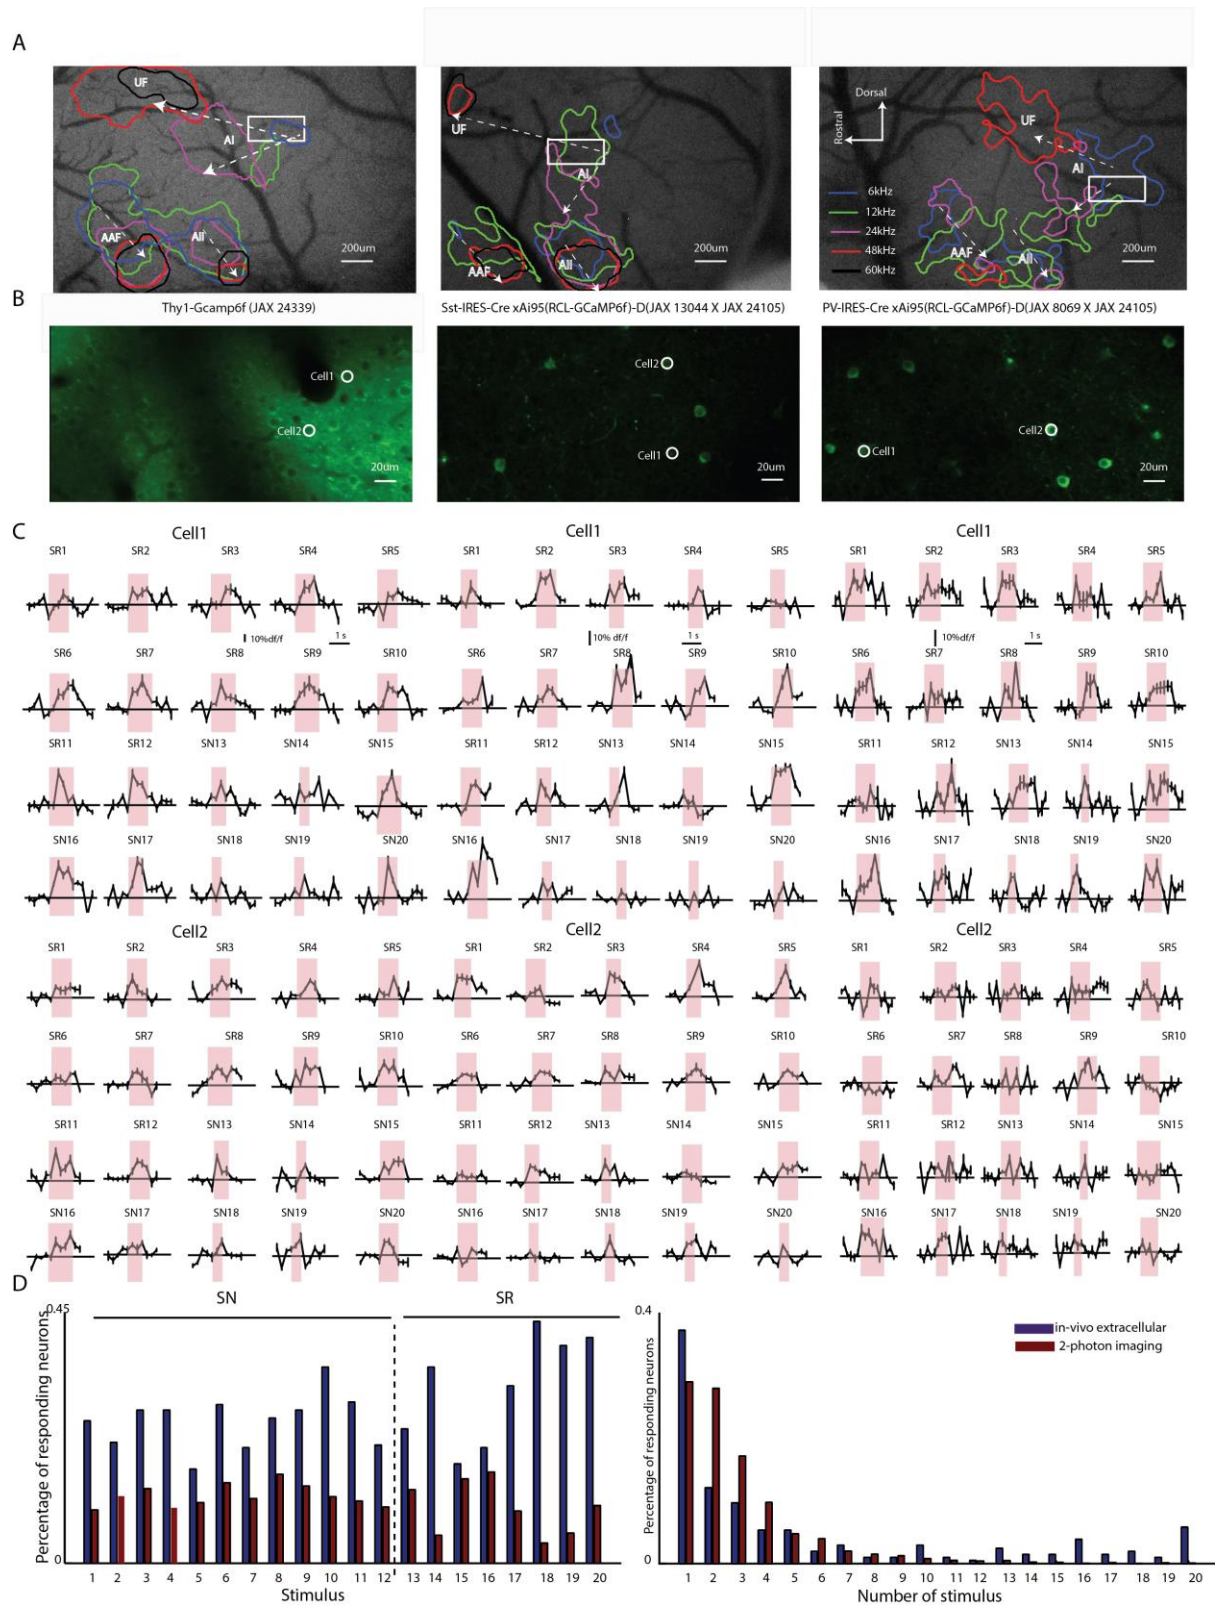

837 the 3 groups of mice. C) Average  $df/f$  plots obtained with 2-photon imaging, in response to each of  
838 the 20 stimuli for 2 cells in each ROI (of B marked as Cell 1 and Cell 2 in each column). D) *Left*: Bar  
839 graphs show percentage of single units (blue) with significant rate responses to each stimulus (1-20)  
840 in AwF-BFEx and that of single Thy-1 positive EXNs (brown) with significant responses in  $Ca^{2+}$  in AwF-  
841 BFEx. *Right*: Bar graphs show (same color representation as in *left*) percentage of neurons  
842 responding to either 1, 2, ... or all 20 of the stimuli.

843

844

845

846

847

848

849

850

851

852

853

854

855

856

857

858

859

860



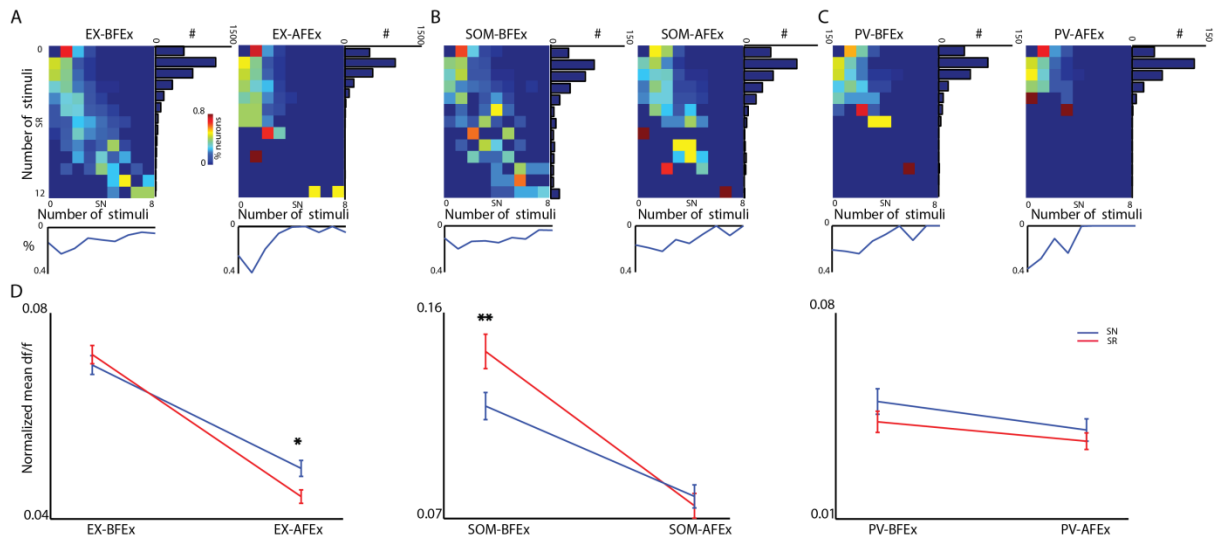

861

862 **Figure 6. Differential effects of social experience driven plasticity in EXNs and SOM INNs**

863 A-C) Each panel represents population data with 2-photon imaging in Thy1-GCamp (A), SOM-GCamp  
864 (B) and PV-GCamp (C) mice, with two matrix plots for before (*left*) and after (*right*) exposure. The  
865 rows in each matrix represent the percentage of neurons in the group and condition that respond to  
866 none (0), one, two ... to all (8) of the SN (x-axis), of the neurons that respond to none (0), one, two ...  
867 to all (12) of the SR (y-axis). Marginal distributions to the right show the number of neurons  
868 responding to the different number of SR. Distribution at the bottom of each matrix plot shows the  
869 average of the rows. D). Comparison of average selectivity to SN and SR in each condition BFE<sub>x</sub> and  
870 AFE<sub>x</sub> (before and after exposure) and between the conditions, for each neuronal type (Thy-1+, *left*,  
871 SOM+, *middle* and PV+, *right*).

872

873

874

875

876

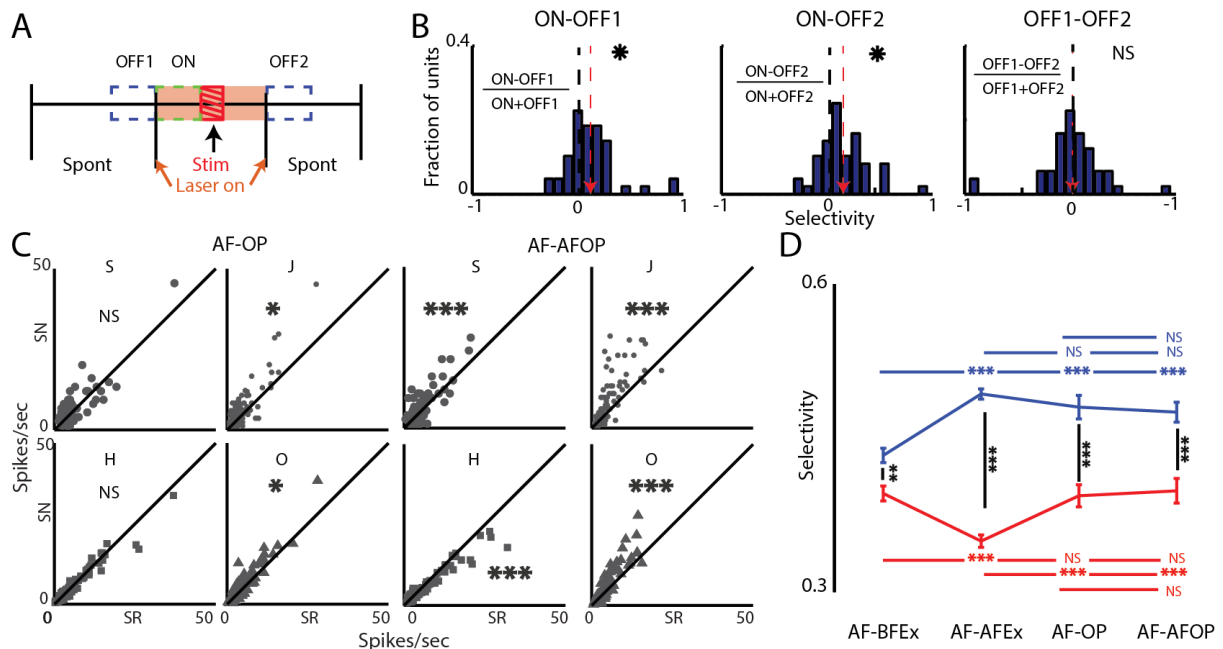

877

878 **Figure 7. Reversible silencing of SOM paired with sequence presentation mimic plasticity in sequence**  
 879 **selectivity without altering syllable selectivity**

880 A) Schematic of sequence of events for optogenetic silencing of SOM and determining laser power.  
 881 For all such experiments the laser was turned on 100 ms pre stimulus onset and turned off 100 ms  
 882 stimulus offset (orange shading). Spontaneous or non-auditory driven activity in 3 periods were  
 883 used, OFF1, ON and OFF2, each 100 ms long and were as depicted. For sequences stimulus onset  
 884 and offset were onset of first syllable and offset of the last syllable of the sequence. B) Histograms of  
 885 modulation index of all cases show significant modulation of spontaneous spiking by light (*left* and  
 886 *middle*, mean: red arrow), and the histogram to the *right* shows comparisons of spontaneous activity  
 887 pre and post light on. C) Scatter plot to compare single syllable mean responses in SN and SR during  
 888 SOM silencing paired with sequences (AF-OP) and after the period of pairing (AF-AFOP), as in Fig. 2D  
 889 and Fig. 4C). D) Similar plot as in Fig. 4E, with AF-BFEx, AF-AFEx (from Fig. 4E) and additionally AF-OP  
 890 and AF-AFOP.

891

892

893

894

895

896

897

898

899

900

901

902 **References**

- 903 1. Marler, P. Birdsong and speech development: could there be parallels? *Am. Sci.* **58**, 669–673  
904 (1970).
- 905 2. Doupe, A. J. & Kuhl, P. K. BIRDSONG AND HUMAN SPEECH: Common Themes and  
906 Mechanisms. *Annu. Rev. Neurosci.* **22**, 567–631 (1999).
- 907 3. Thorpe, W. H. Bird-Song. The Biology of Vocal Communication and Expression in Birds. **79**,  
908 722–723 (1961).
- 909 4. Konishi, M. The Role of Auditory Feedback in the Control of Vocalization in the White-  
910 Crowned Sparrow. *Zeitschrift für Tierpsychologie* **22**, 770–783 (1965).
- 911 5. Brainard, M. S. & Doupe., A. J. What songbirds teach us about learning. *Nature* **417**, 351–358  
912 (2002).
- 913 6. Mori, C. & Wada, K. Songbird: a unique animal model for studying the molecular basis of  
914 disorders of vocal development and communication. *Exp. Anim.* **64**, (2015).
- 915 7. Doupe, A. J. & Konishi, M. *Song-selective auditory circuits in the vocal control system of the*  
916 *zebra finch (birdsong/brain/auditory feedback/complex auditory neuron/learning)*. *Proc. Natl.*  
917 *Acad. Sci. USA* **88**, (1991).
- 918 8. Doupe, A. J. *Song-and Order-Selective Neurons in the Songbird Anterior Forebrain and their*  
919 *Emergence during Vocal Development*. (1997).
- 920 9. Arriaga, G., Zhou, E. P. & Jarvis, E. D. Of Mice, Birds, and Men: The Mouse Ultrasonic Song  
921 System Has Some Features Similar to Humans and Song-Learning Birds. *PLoS One* **7**, (2012).
- 922 10. Arriaga, G. & Jarvis, E. D. Mouse vocal communication system: Are ultrasounds learned or  
923 innate? *Brain and Language* **124**, 96–116 (2013).
- 924 11. Portfors, C. V. & Perkel, D. J. The role of ultrasonic vocalizations in mouse communication.  
925 *Curr. Opin. Neurobiol.* **28**, (2014).
- 926 12. Musolf, K., Meindl, S., Larsen, A. L., Kalcounis-Rueppell, M. C. & Penn, D. J. Ultrasonic  
927 vocalizations of male mice differ among species and females show assortative preferences for  
928 male calls. *PLoS One* **10**, (2015).
- 929 13. Matsumoto, Y. K. & Okanoya, K. Mice modulate ultrasonic calling bouts according to  
930 sociosexual context. *R. Soc. Open Sci.* **5**, 1–15 (2018).
- 931 14. Ehret, G. & Haack, B. Motivation and arousal influence sound-induced maternal pup-  
932 retrieving behavior in lactating house mice. *Z. Tierpsychol.* **65**, (1984).
- 933 15. Egnor, S. E. R. & Seagraves, K. M. The contribution of ultrasonic vocalizations to mouse  
934 courtship. *Curr. Opin. Neurobiol.* **38**, 1–5 (2016).
- 935 16. Fischer, J. & Hammerschmidt, K. Ultrasonic vocalizations in mouse models for speech and  
936 socio-cognitive disorders: Insights into the evolution of vocal communication. *Genes, Brain*  
937 *Behav.* **10**, (2011).
- 938 17. Mahrt, E. J., Perkel, D. J., Tong, L., Rubel, E. W. & Portfors, C. V. Engineered deafness reveals  
939 that mouse courtship vocalizations do not require auditory experience. **33**, (2013).

- 940 18. Josh Huang, Z. & Zeng, H. Genetic approaches to neural circuits in the mouse. *Annual Review*  
941 *of Neuroscience* **36**, 183–215 (2013).
- 942 19. Vázquez-Guardado, A., Yang, Y., Bandodkar, A. J. & Rogers, J. A. Recent advances in  
943 neurotechnologies with broad potential for neuroscience research. *Nature Neuroscience* **23**,  
944 1522–1536 (2020).
- 945 20. Shannon, C. E. Prediction and Entropy of Printed English. *Bell Syst. Tech. J.* **30**, 50–64 (1951).
- 946 21. Nelken, I., Rotman, Y. & Yosef, O. B. Responses of auditory-cortex neurons to structural  
947 features of natural sounds Israel. *Nature* **397**, (1999).
- 948 22. Bendor, D. & Wang, X. The Neuronal Representation of Pitch in Primate Auditory Cortex.  
949 *Nature* **436**, (2005).
- 950 23. Malone, B. & Schreiner, C. E. Time-varying sounds: Amplitude envelope modulations. *Oxford*  
951 *Handb. Audit. Sci. Audit. Brain* 1–28 (2012). doi:10.1093/oxfordhb/9780199233281.013.0006
- 952 24. Bandyopadhyay, S. & Young, E. D. Nonlinear temporal receptive fields of neurons in the  
953 dorsal cochlear nucleus. *J. Neurophysiol.* **110**, 2414–2425 (2013).
- 954 25. Suga, N. Philosophy and stimulus design for neuroethology of complex-sound processing.  
955 *Philos. Trans. R. Soc. Lond. B. Biol. Sci.* **336**, 423–428 (1992).
- 956 26. Wang, X., Merzenich, M. M., Beitel, R. & Schreiner, C. E. *Representation of a Species-Specific*  
957 *Vocalization in the Primary Auditory Cortex of the Common Marmoset: Temporal and Spectral*  
958 *Characteristics. JOURNAL OF NEUROPHYSIOLOGY* **74**, (1995).
- 959 27. Wang, X. & Kadia, S. C. *Differential Representation of Species-Specific Primate Vocalizations in*  
960 *the Auditory Cortices of Marmoset and Cat.* (2001).
- 961 28. Tasaka, G. I. *et al.* Genetic tagging of active neurons in auditory cortex reveals maternal  
962 plasticity of coding ultrasonic vocalizations. *Nat. Commun.* **9**, (2018).
- 963 29. Galindo-Leon, E. E., Lin, F. G. & Liu, R. C. Inhibitory Plasticity in a Lateral Band Improves  
964 Cortical Detection of Natural Vocalizations. *Neuron* **62**, 705–716 (2009).
- 965 30. Wang, M. *et al.* Single-neuron representation of learned complex sounds in the auditory  
966 cortex. *Nat. Commun.* **11**, (2020).
- 967 31. Quirk, G. J., Armony, J. L. & LeDoux, J. E. Fear conditioning enhances different temporal  
968 components of tone-evoked spike trains in auditory cortex and lateral amygdala. *Neuron* **19**,  
969 613–624 (1997).
- 970 32. Fritz, J., Shamma, S., Elhilali, M. & Klein, D. Rapid task-related plasticity of spectrotemporal  
971 receptive fields in primary auditory cortex. *Nat. Neurosci.* **6**, 1216–1223 (2003).
- 972 33. Beitel, R. E., Schreiner, C. E., Cheung, S. W., Wang, X. & Merzenich, M. M. Reward-dependent  
973 plasticity in the primary auditory cortex of adult monkeys trained to discriminate temporally  
974 modulated signals. *Proc. Natl. Acad. Sci. U. S. A.* **100**, 11070–11075 (2003).
- 975 34. Kline, A. M., Aponte, D. A., Tsukano, H., Giovannucci, A. & Kato, H. K. Inhibitory gating of  
976 coincidence-dependent sensory binding in secondary auditory cortex. *Nat. Commun.* **12**, 1–56  
977 (2021).
- 978 35. Zeng, H. H. *et al.* Distinct natural syllable-selective neuronal ensembles in the primary

- 979 auditory cortex of awake marmosets. *bioRxiv* (2021).
- 980 36. Pi, H. J. *et al.* Cortical interneurons that specialize in disinhibitory control. *Nature* **503**, 521–  
981 524 (2013).
- 982 37. Veit, L., Tian, L. Y., Monroy Hernandez, C. J. & Brainard, M. S. Songbirds can learn flexible  
983 contextual control over syllable sequencing. *Elife* (2020). doi:10.1101/2020.08.05.238717
- 984 38. Scattoni, M. L., Crawley, J. & Ricceri, L. Ultrasonic vocalizations: A tool for behavioural  
985 phenotyping of mouse models of neurodevelopmental disorders. *Neuroscience and*  
986 *Biobehavioral Reviews* **33**, 508–515 (2009).
- 987 39. Chabout, J., Sarkar, A., Dunson, D. B. & Jarvis, E. D. Male mice song syntax depends on social  
988 contexts and influences female preferences. *Front. Behav. Neurosci.* **9**, (2015).
- 989 40. Grimsley, J. M. S. *et al.* Contextual modulation of vocal behavior in mouse: Newly identified  
990 12 kHz “Mid-frequency” vocalization emitted during restraint. *Front. Behav. Neurosci.* **10**,  
991 (2016).
- 992 41. Seong, E., Seasholtz, A. F. & Burmeister, M. Mouse models for psychiatric disorders. *TRENDS*  
993 *Genet.* **18**, (2002).
- 994 42. Agarwalla, S. *et al.* Male-specific alterations in structure of isolation call sequences of mouse  
995 pups with 16p11.2 deletion. *Genes, Brain Behav.* **19**, 1–13 (2020).
- 996 43. Holy, T. E. & Guo, Z. Ultrasonic songs of male mice. *PLoS Biol.* **3**, 1–10 (2005).
- 997 44. Cover, T. & Thomas, J. *Elements of Information theory. Exchange Organizational*  
998 *Behavior Teaching Journal* (John Wiley & Sons, Inc., Hoboken, New Jersey, 2006).  
999 doi:10.1007/978-94-010-9292-0
- 1000 45. Bandyopadhyay, S. & Young, E. D. Discrimination of Voiced Stop Consonants Based on  
1001 Auditory Nerve Discharges. *J. Neurosci.* **24**, (2004).
- 1002 46. Chabout, J. *et al.* A Foxp2 mutation implicated in human speech deficits alters sequencing of  
1003 ultrasonic vocalizations in adult male mice. *Front. Behav. Neurosci.* **10**, (2016).
- 1004 47. Grimsley, J. M. S., Monaghan, J. J. M. & Wenstrup, J. J. Development of Social Vocalizations in  
1005 Mice. **6**, (2011).
- 1006 48. Itti, L. & Baldi, P. Bayesian surprise attracts human attention. *Adv. Neural Inf. Process. Syst.*  
1007 547–554 (2005).
- 1008 49. Sharma, S. & Bandyopadhyay, S. Differential rapid plasticity in auditory and visual responses  
1009 in the primarily multisensory orbitofrontal cortex. *eNeuro* **7**, 1–17 (2020).
- 1010 50. Srivastava, H. K. & Bandyopadhyay, S. Parallel lemniscal and non-lemniscal sources control  
1011 auditory responses in the orbitofrontal cortex (OFC). *eNeuro* **7**, 1–19 (2020).
- 1012 51. Carbajal, G. V. & Malmierca, M. S. The Neuronal Basis of Predictive Coding Along the Auditory  
1013 Pathway: From the Subcortical Roots to Cortical Deviance Detection. *Trends Hear.* **22**, 1–33  
1014 (2018).
- 1015 52. Mehra, M., Mukesh, A. & Bandyopadhyay, S. Separate functional subnetworks of excitatory  
1016 neurons show preference to periodic and random sound structures. *bioRxiv* 1–6 (2021).



- 1017 53. Yang, M. *et al.* Male mice emit distinct ultrasonic vocalizations when the female leaves the  
1018 social interaction arena. **7**, 1–13 (2013).
- 1019 54. Schreiner, C. E. & Polley, D. B. Auditory map plasticity: Diversity in causes and consequences.  
1020 *Curr. Opin. Neurobiol.* **24**, 143–156 (2014).
- 1021 55. Mehra, M., Mukesh, A. & Bandyopadhyay, S. Earliest experience of rare but not frequent  
1022 sounds cause long term changes in the adult auditory cortex. *bioRxiv* (2019).  
1023 doi:10.1101/2019.12.24.887836
- 1024 56. Sharma, S., Srivastava, H. K. & Bandyopadhyay, S. Modulation of auditory responses by visual  
1025 inputs in the mouse auditory cortex. *bioRxiv* 2021.01.22.427870 (2021).
- 1026 57. Stiebler, I., Neulist, R. & Fichtel, I. The auditory cortex of the house mouse : left-right  
1027 differences , tonotopic organization and quantitative analysis of frequency representation.  
1028 559–571 (1997).
- 1029 58. Bandyopadhyay, S., Shamma, S. A. & Kanold, P. O. Dichotomy of functional organization in  
1030 the mouse auditory cortex. *Nat. Publ. Gr.* **13**, 361–368 (2010).
- 1031 59. Issa, J. B. *et al.* Multiscale optical Ca<sup>2+</sup> imaging of tonal organization in mouse auditory  
1032 cortex. *Neuron* **83**, (2014).
- 1033 60. Siegle, J. H. *et al.* Reconciling functional differences in populations of neurons recorded with  
1034 two-photon imaging and electrophysiology. *Elife* **10**, 1–42 (2021).
- 1035 61. Rothschild, G., Nelken, I. & Mizrahi, A. Functional organization and population dynamics in  
1036 the mouse primary auditory cortex. *Nat. Publ. Gr.* **13**, 353–360 (2010).
- 1037 62. Ryan G., N. *et al.* Complementary control of sensory adaptation by two types of cortical  
1038 interneurons. *Elife* **4**, (2015).
- 1039 63. Wang, X. On cortical coding of vocal communication sounds in primates. *Proc. Natl. Acad. Sci.*  
1040 **97**, (2000).
- 1041 64. Mizrahi, A., Shalev, A. & Nelken, I. ScienceDirect Single neuron and population coding of  
1042 natural sounds in auditory cortex. *Curr. Opin. Neurobiol.* **24**, 103–110 (2014).
- 1043 65. Chong, K. K., Anandakumar, D. B., Dunlap, A. G., Kacsoh, D. B. & Liu, R. C. Experience-  
1044 dependent coding of time-dependent frequency trajectories by off responses in secondary  
1045 auditory cortex. *J. Neurosci.* **40**, 4469–4482 (2020).
- 1046 66. Chabout, J., Serreanu, P., Ey, E., Bellier, L. & Aubin, T. Adult Male Mice Emit Context-Specific  
1047 Ultrasonic Vocalizations That Are Modulated by Prior Isolation or Group Rearing  
1048 Environment. **7**, 1–9 (2012).
- 1049 67. Maggio, J. C. & Whitney, G. Ultrasonic vocalizing by adult female mice (*Mus musculus*).  
1050 *Journal of comparative psychology (Washington, D.C. : 1983)* **99**, 420–436 (1985).
- 1051 68. White, N. R. *et al.* 40-and 70-kHz Vocalizations of Mice (*Mus musculus*) during Copulation.  
1052 *Physiology & Behavior* **63**, (1998).
- 1053 69. Grimsley, J. M. S., Hazlett, E. G. & Wenstrup, J. J. Coding the meaning of sounds: Contextual  
1054 modulation of auditory responses in the basolateral amygdala. *J. Neurosci.* **33**, 17538–17548  
1055 (2013).

- 1056 70. Lupanova, A. S. & Egorova, M. A. Vocalization of sex partners in the house mouse (*Mus*  
1057 *Musculus*). *J. Evol. Biochem. Physiol.* **51**, 324–331 (2015).
- 1058 71. Sangiamo, D. T., Warren, M. R. & Neunuebel, J. P. Ultrasonic signals associated with different  
1059 types of social behavior of mice. *Nat. Neurosci.* **23**, 411–422 (2020).
- 1060 72. Ivanenko, A., Watkins, P., van Gerven, M. A. J., Hammerschmidt, K. & Englitz, B. Classifying  
1061 sex and strain from mouse ultrasonic vocalizations using deep learning. *PLoS Comput. Biol.*  
1062 **16**, 1–27 (2020).
- 1063 73. Bhumika, S. *et al.* A Late Critical Period for Frequency Modulated Sweeps in the Mouse  
1064 Auditory System. *Cereb. Cortex* **30**, 2586–2599 (2020).
- 1065 74. Kral, A. Auditory critical periods: A review from system’s perspective. *Neuroscience* **247**, 117–  
1066 133 (2013).
- 1067 75. Winkowski, D. E., Bandyopadhyay, S., Shamma, S. A. & Kanold, P. O. Frontal cortex activation  
1068 causes rapid plasticity of auditory cortical processing. *J. Neurosci.* **33**, 18134–18148 (2013).
- 1069 76. Chavez, C. M., McGaugh, J. L. & Weinberger, N. M. The basolateral amygdala modulates  
1070 specific sensory memory representations in the cerebral cortex Candice. *Neurobiol. Learn.*  
1071 *Mem.* **91**, 382–392 (2009).
- 1072 77. Pérez-González, D. & Malmierca, M. S. Adaptation in the auditory system: An overview. *Front.*  
1073 *Integr. Neurosci.* **8**, 1–10 (2014).
- 1074 78. Ulanovsky, N., Las, L., Farkas, D. & Nelken, I. Multiple time scales of adaptation in auditory  
1075 cortex neurons. *J. Neurosci.* **24**, 10440–10453 (2004).
- 1076 79. Kim, R. & Sejnowski, T. J. Strong inhibitory signaling underlies stable temporal dynamics and  
1077 working memory in spiking neural networks. *Nat. Neurosci.* **24**, 129–139 (2021).
- 1078 80. Nakajima, M., Görlich, A. & Heintz, N. Oxytocin modulates female sociosexual behavior  
1079 through a specific class of prefrontal cortical interneurons. *Cell* **159**, 295–305 (2014).
- 1080 81. Hashikawa, K., Hashikawa, Y., Falkner, A. & Lin, D. The neural circuits of mating and fighting in  
1081 male mice. *Curr. Opin. Neurobiol.* **38**, (2016).
- 1082 82. Zhang, S. X. *et al.* Hypothalamic dopamine neurons motivate mating through persistent cAMP  
1083 signalling. *Nature* **597**, 245–249 (2021).
- 1084 83. Portfors, C. V. Types and functions of ultrasonic vocalizations in laboratory rats and mice. *J.*  
1085 *Am. Assoc. Lab. Anim. Sci.* **46**, (2007).
- 1086 84. Chase, S. M. & Young, E. D. First-spike latency information in single neurons increases when  
1087 referenced to population onset. **104**, (2007).
- 1088 85. Park, J. H. *et al.* Optogenetic Modulation of Urinary Bladder Contraction for Lower Urinary  
1089 Tract Dysfunction. *Sci. Rep.* **7**, 1–13 (2017).

1090

1091

1092

1093 **Supplementary Material**

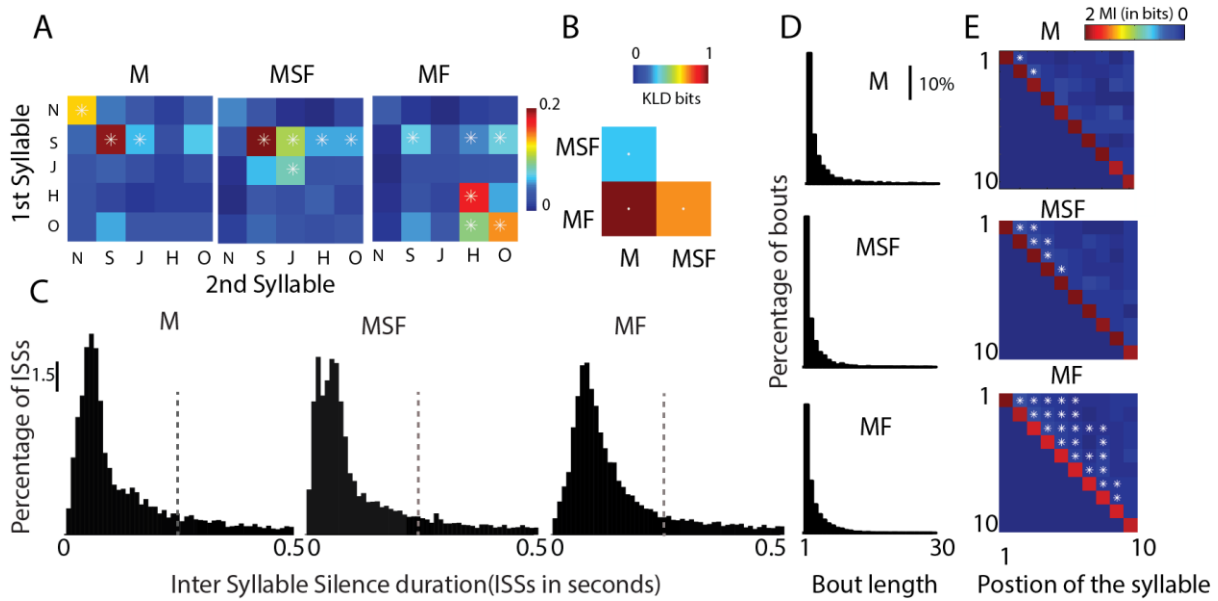

1094

1095 **Figure S1. Context specific modulation in adult male mouse**

1096 A) Joint probability distributions of syllable to syllable transition considering starting 2 syllables in  
 1097 bouts is depicted in each of first 3 matrices in the row for the 3 contexts of the adult male (M, MF  
 1098 and MSF). B) The diagonal matrix quantifies the *KLD* between joint distributions shown in S1A. C)  
 1099 The three distributions depict the inter-syllable silences (ISSs) observed in each context of adult  
 1100 male. The vertical dashed line (at 250 ms) marks mean + 1\*STD of the overall data. D) The  
 1101 distribution of percentage of bouts of a particular length present in each of the contexts is shown E)  
 1102 The 3 matrices represent the *MI* calculated as in Fig. 1D with each row showing the *MI* for the  $n^{th}$   
 1103 syllable with the 1<sup>st</sup> (row 1), 2<sup>nd</sup> (row 2), 3<sup>rd</sup> (row 3) and so on. The diagonal elements show the  
 1104 entropy of the syllable in the corresponding position from the bout start. Asterisks indicate  
 1105 significance at 95% confidence for (A), (B) and (D).

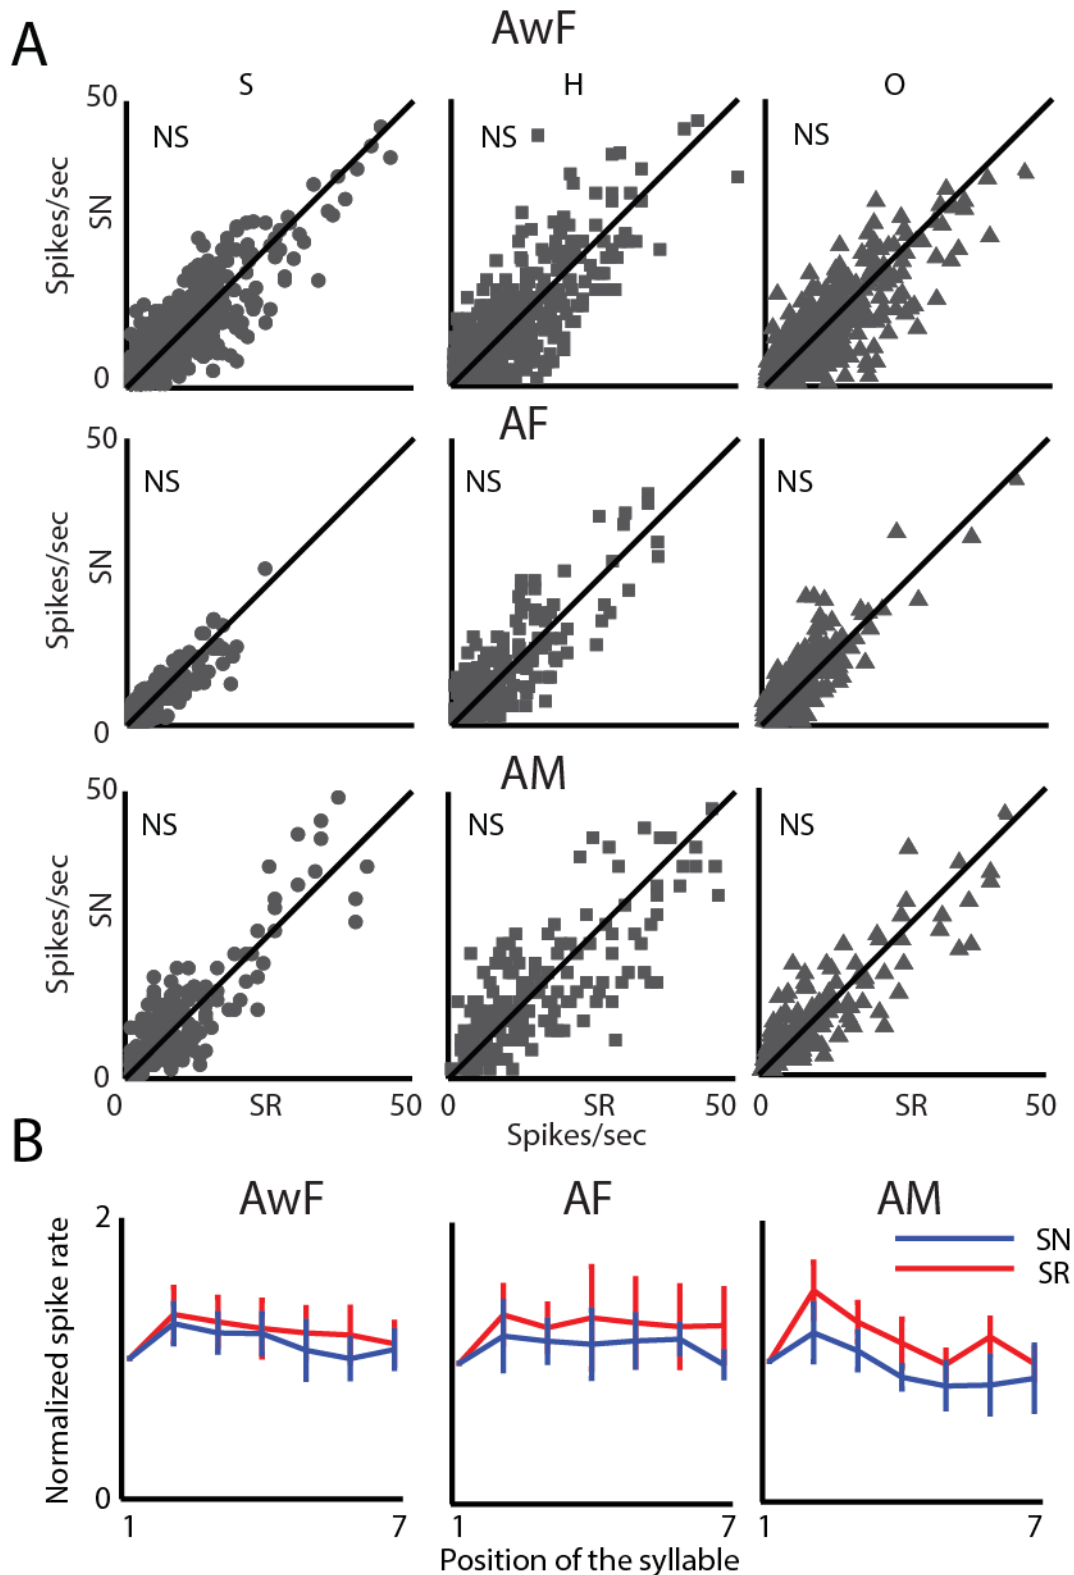

1106

1107

**Figure S2.** Similar mean response rate and time scales of adaptation for SN and SR

1108

1109

1110

1111

A) Scatter plots show comparison of mean response rates of all common first (identified by solid symbols, S: large circle, H: square, O: triangle) syllables types in SN and SR in 3 groups of mice, AwF, AF and AM. D) Profile of changes in the normalized response strength for each position of the sequences SN (blue) and SR (red) over time concerning the syllable in the starting position.

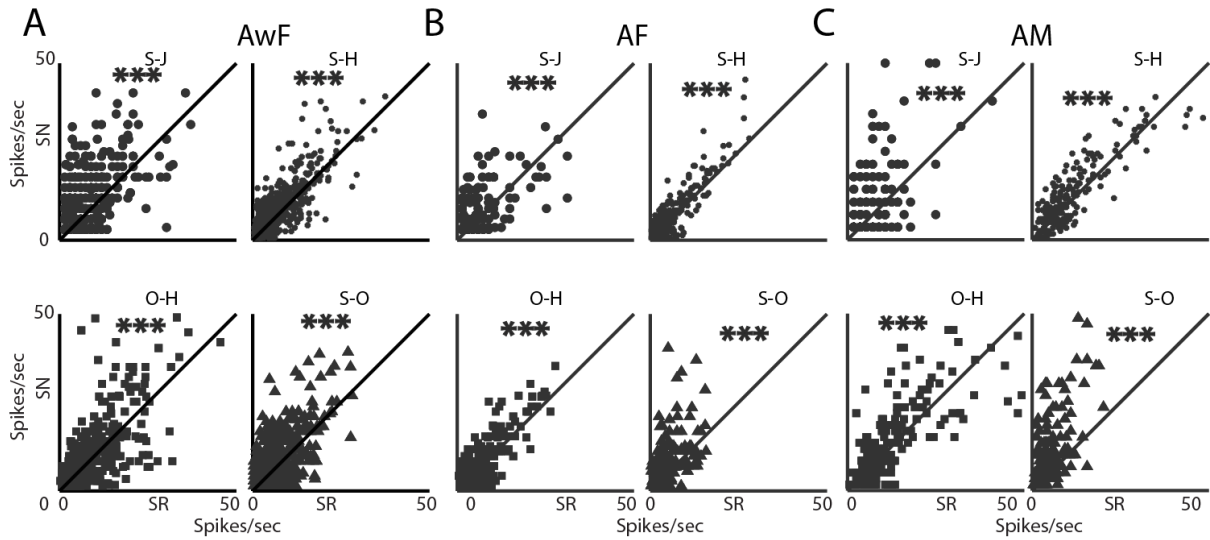

1112

1113 **Figure S3.** Context specificity in common disyllables with first transition in the starting position for SN

1114 Scatter plot of comparison between mean rate responses to first transition in SN (S-J, S-H, S-O and  
1115 O-H) and the same transition present at any position in SR based on response to the second  
1116 component, excluding the first transition for the three groups AwF (A), AF (B) and AM (C).

1117

1118

1119

1120

1121

1122

1123



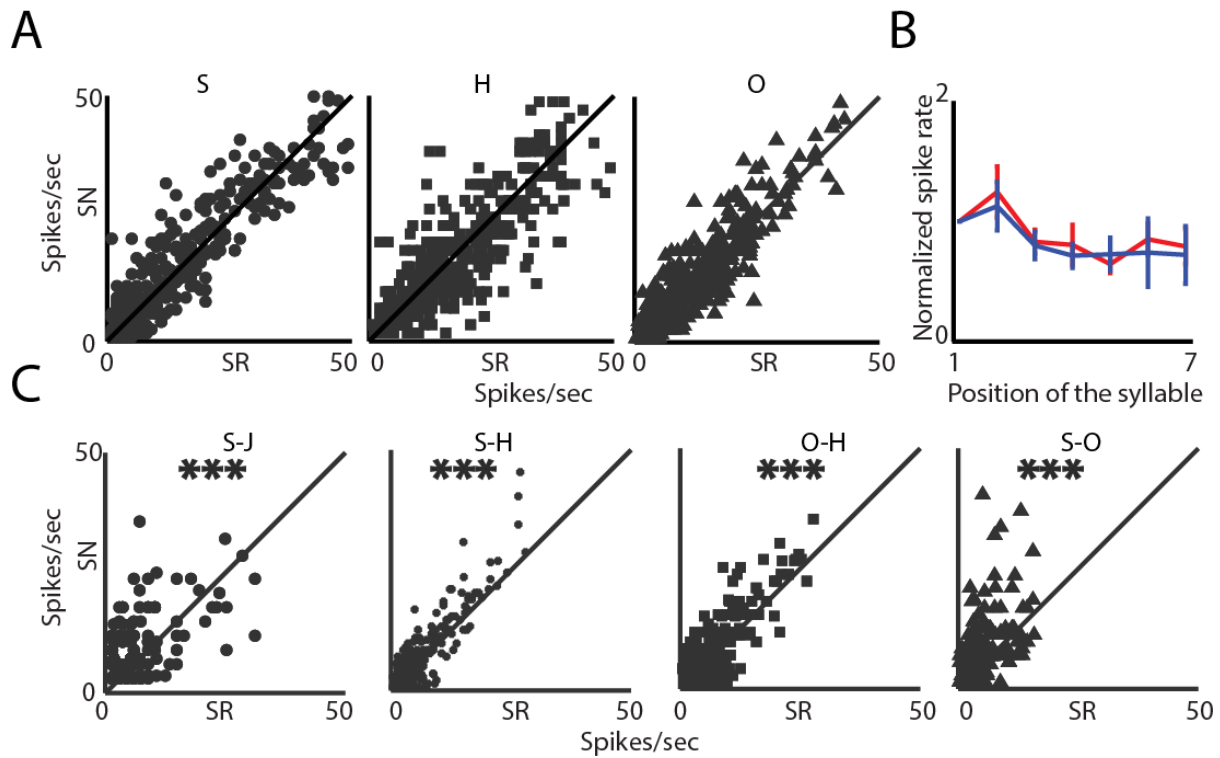

1124

1125 **Figure S4.** *No alteration due to experience in mean response rate and time scales of adaptation*

1126 A) Scatter plots show comparison of mean response rates of all common first (identified by solid  
1127 symbols, S: large circle, H: square, O: triangle) syllables types in SN and SR for AF-AFEx. B) Profile of  
1128 changes in the normalized response strength for each position of the sequences SN (blue) and SR  
1129 (red) over time with respect to the syllable in the starting position. C) Scatter plot of mean rate  
1130 responses to first transition in SN (S-J, S-H, S-O and O-H) based on response to the second  
1131 component, excluding the first transition.

1132

1133

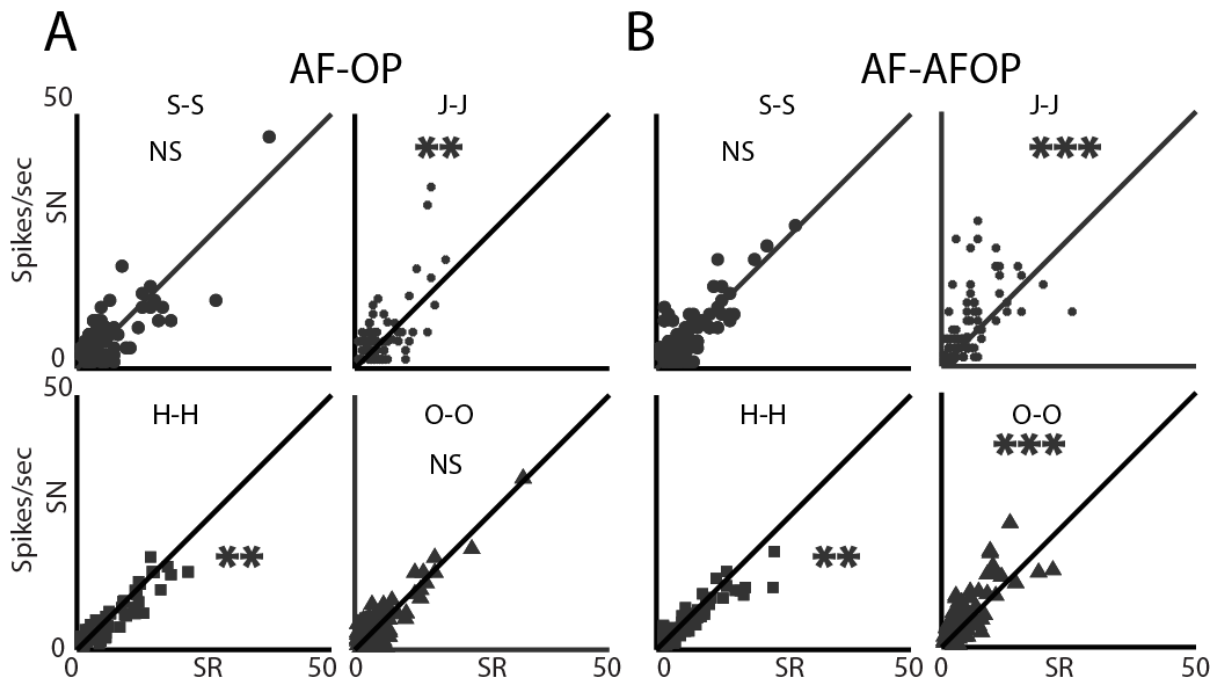

1134

1135 **Figure S5.** Effect of plasticity due to photo inhibition of SOM not reflected at disyllabic level

1136 AB) Scatter plots comparing mean response rates of common syllables (identified by solid symbols,  
1137 S: large circle, J: small circle, H: square, O: triangle) in SN and SR, excluding occurrence in the first  
1138 position for the AF-OP and AF-AFOP groups. The arrangement is same as in Fig.3B.

1139
